# Supplementary material for: Social Needs and Happiness: A Life Course Perspective
Source: Springer Nature journal article supplement (doi:10.1007/s10902-020-00287-9), 2020-07-10
Supplement: MOESM1 [file 18171478]

## Supplement 1: SPF-IL(s) questionnaire

Table S1.1  
SPF-IL(s) questionnaire on social needs

| Scale                   | Dutch                                                                                                                                                    | English                                                                                                                                                                    |
|-------------------------|----------------------------------------------------------------------------------------------------------------------------------------------------------|----------------------------------------------------------------------------------------------------------------------------------------------------------------------------|
| Affection               | Hebben mensen aandacht voor u?                                                                                                                           | Do people pay attention to you?                                                                                                                                            |
|                         | Wil men u helpen als u een probleem heeft?                                                                                                               | Do people want to help you if you have a problem?                                                                                                                          |
|                         | Voelt u dat mensen echt van u houden?                                                                                                                    | Do you feel that people really love you?                                                                                                                                   |
| Behavioral confirmation | <i>Er zijn situaties waarin men te maken heeft met groepen mensen, zoals bij familie, een vereniging of de kerk. Waarden anderen uw rol in de groep?</i> | <i>There are situations in which men has to deal with groups of people, like with family, at an association or in church. Do others appreciate your role in the group?</i> |
|                         | Vinden mensen u betrouwbaar?                                                                                                                             | Do people find you trustworthy?                                                                                                                                            |
|                         | Voelt u zich nuttig voor anderen?                                                                                                                        | Do you feel useful to others?                                                                                                                                              |
|                         |                                                                                                                                                          |                                                                                                                                                                            |
| Status                  | Vindt men dat u beter presteert dan anderen?                                                                                                             | Do people think you achieve more than others?                                                                                                                              |
|                         | Ziet men u als iemand met invloed?                                                                                                                       | Do people see you as someone with influence?                                                                                                                               |
|                         | Staat u bekend om dingen die u heeft gepresteerd?                                                                                                        | Do people know you for your achievements?                                                                                                                                  |

Table S1.2  
Correlations between main variables and socio-demographic indicators

| Variable           | N     | Affection | Confirmation | Status | Happiness | Age  | Gender |
|--------------------|-------|-----------|--------------|--------|-----------|------|--------|
| Life satisfaction  | 6,057 | .44       | .41          | .31    | .77       | .08  | .05    |
| Partner            | 6,057 | .17       | .10          | .09    | .20       | .09  | .05    |
| Children           | 6,057 | .01       | .08          | .10    | .08       | .50  | .12    |
| Living alone       | 6,057 | -.13      | -.09         | -.05   | -.16      | .04  | -.03   |
| Household size     | 6,057 | .11       | .07          | .04    | .09       | -.17 | .02    |
| Religion contact   | 5,907 | .02       | .03          | .01    | .04       | -.01 | -.01   |
| Income             | 5,606 | .13       | .14          | .23    | .22       | .22  | .13    |
| Paid job: total    | 6,057 | .13       | .12          | .14    | .12       | -.21 | -.03   |
| Paid job: full job | 3,419 | .00       | .03          | .21    | .08       | -.01 | .36    |
| Unpaid job         | 6,057 | -.01      | .01          | -.05   | -.03      | -.01 | -.10   |
| Retired            | 6,057 | -.04      | .02          | .03    | .07       | .54  | .16    |
| Education          | 5,993 | .14       | .10          | .16    | .12       | -.13 | -.02   |
| Owning house       | 6,057 | .03       | .08          | .12    | .12       | .40  | .11    |

Correlations >.03 are significant with  $p > .001$

## **Socio-demographic patterns**

Correlations between social need fulfilment and several social and demographic indicators are shown in Table S1.2, including having a partner, children, or paid job. The social need constructs showed correlations with external variables in line with the idea behind the social need constructs, as status showed the strongest link with income ( $r = .23$ ) and affection fulfilment with having a partner ( $r = .17$ ). The external correlations with behavioral confirmation were less clear as the correlations often fell in between the associations with status and affection, the highest unique association was with church attendance ( $r = .03$ ). These correlations illustrate that the unique correlations for the social needs were rather weak and behavioral confirmation may capture a blend of affect and status.

**Operationalization.** Life satisfaction was measured with the question “Can you tell how you experience your live as a whole at this moment?” and could be answered with 1 – Can’t be worse, to 7 – Can’t be better. People were also asked if they have a partner, how many children they have (including step/adopted children), and if they lived alone or with how many people they shared a household. Furthermore, people were asked if they ever attended church, had a paid job, and about their household income (1 – less than 750 a month, till 8 – more than 3500 a month). The people who reported to have a paid job were also asked how many hours they worked per week (fulltime job was coded as >35 hours a week). It was also asked if people had an unpaid job and if they were retired. Lastly, people were asked about their education level (1 – no finished education, till 8 – university level) and if they owned a house.
