# Supplementary material for: Social Needs and Happiness: A Life Course Perspective
Source: Springer Nature journal article supplement (doi:10.1007/s10902-020-00287-9), 2020-07-10
Supplement: MOESM2 [file 18171478]

## Supplement 2: Descriptive statistics

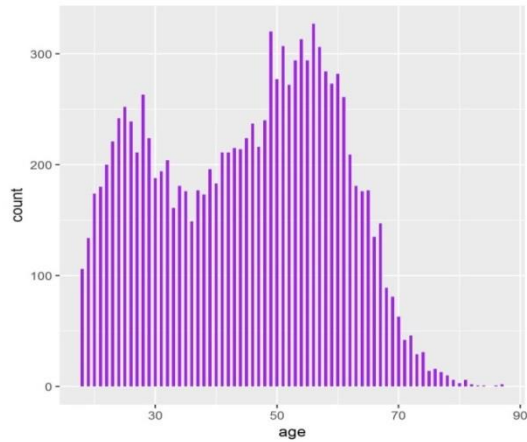

Figure S2.1. Histogram of age.

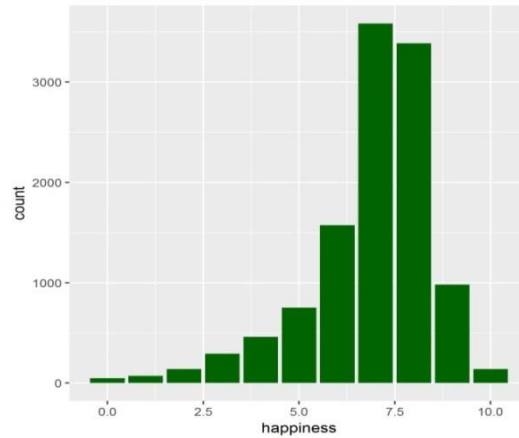

Figure S2.2. Histogram of happiness.

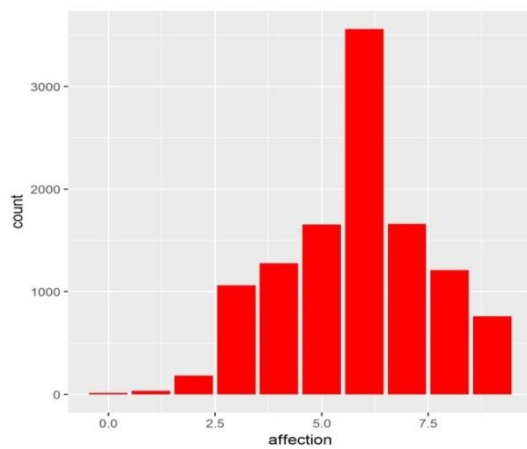

Figure S2.3. Histogram of affection.

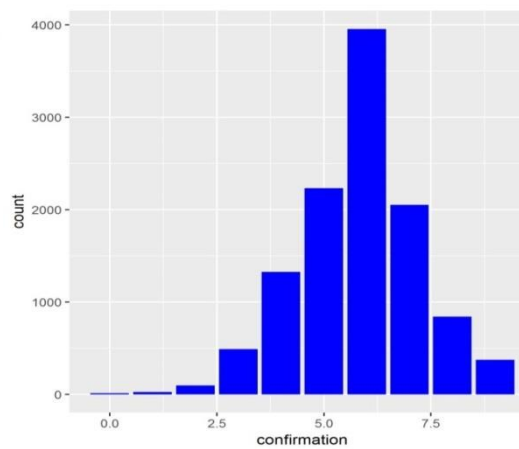

Figure S2.4. Histogram of behavioral confirmation.

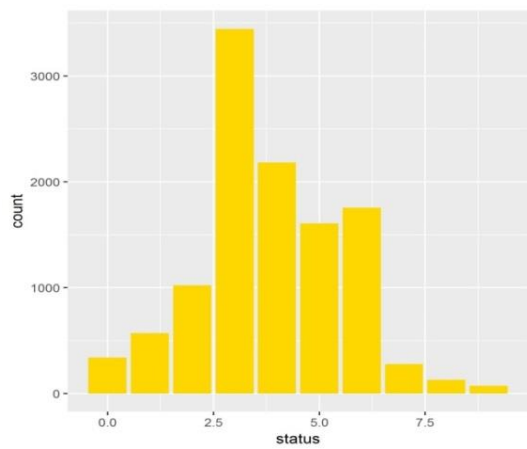

Figure S2.5. Histogram of status

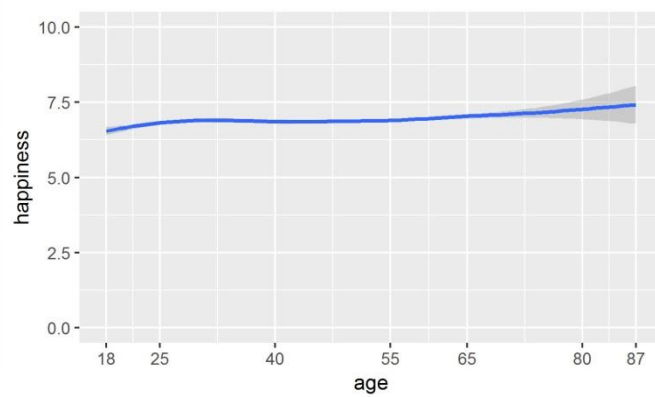

Figure S2.6. Happiness with age.

Table S2.1

*Descriptive statistics of the main variables*

| Measure                  | N     | Min. | Max. | Mean (SD)                       | Spearman correlations <sup>2</sup> |                   |               |            |               |                  |
|--------------------------|-------|------|------|---------------------------------|------------------------------------|-------------------|---------------|------------|---------------|------------------|
|                          |       |      |      |                                 | <u>affection</u>                   | <u>beh. conf.</u> | <u>status</u> | <u>age</u> | <u>gender</u> | <u>education</u> |
| Affection                | 11416 | 0    | 9    | 5.82 (1.72)                     |                                    | .56               | .33           | -.08       | -.08          | .12              |
| Behavioural confirmation | 11412 | 0    | 9    | 5.82 (1.42)                     |                                    |                   | .47           | .06        | .01           | .11              |
| Status                   | 11411 | 0    | 9    | 3.85 (1.70)                     |                                    |                   |               | .09        | .16           | .16              |
| Age                      | 11487 | 18   | 87   | 44.82 (14.62)                   |                                    |                   |               |            | .17           | -.01             |
| Gender <sup>1</sup>      | 11487 | 0    | 1    | 33% male,<br>67% female         |                                    |                   |               |            |               | -.03             |
| Education                | 11386 | 1    | 3    | 5% low,<br>18% med,<br>77% high |                                    |                   |               |            |               |                  |
| Happiness                | 11429 | 0    | 10   | 6.88 (1.63)                     | .51                                | .46               | .34           | .07        | .04           | .11              |

<sup>1</sup> Gender was coded 0 = female, 1 = male. <sup>2</sup> Correlations >(-).03 are significant with  $p < .001$ .

Table S2.2

*Distribution of the social needs per age category*

| Age category      | N            | M age        | M affection           | M confirmation      | M status              | M happiness         | Percentage men | Percentage higher educated |
|-------------------|--------------|--------------|-----------------------|---------------------|-----------------------|---------------------|----------------|----------------------------|
| Emerging adult    | 1509         | 22.1         | 5.96 <sup>a,b</sup>   | 5.68 <sup>a</sup>   | 3.60 <sup>a</sup>     | 6.69 <sup>a</sup>   | 22%            | 69%                        |
| Young adult       | 2736         | 32.1         | 6.01 <sup>b</sup>     | 5.73 <sup>a</sup>   | 3.72 <sup>a,b</sup>   | 6.88 <sup>a,b</sup> | 28%            | 82%                        |
| Middle-aged adult | 3734         | 47.7         | 5.79 <sup>a,c</sup>   | 5.85 <sup>a,b</sup> | 3.90 <sup>b,c</sup>   | 6.87 <sup>a,b</sup> | 32%            | 77%                        |
| Late adult        | 2593         | 59.0         | 5.67 <sup>c</sup>     | 5.91 <sup>b</sup>   | 3.98 <sup>c</sup>     | 6.94 <sup>b</sup>   | 40%            | 75%                        |
| Young old         | 899          | 68.5         | 5.62 <sup>a,c</sup>   | 5.89 <sup>a,b</sup> | 4.08 <sup>c</sup>     | 7.10 <sup>b</sup>   | 53%            | 73%                        |
| Oldest-old        | 16           | 82.3         | 5.81 <sup>a,b,c</sup> | 5.94 <sup>a,b</sup> | 3.88 <sup>a,b,c</sup> | 7.38 <sup>a,b</sup> | 75%            | 63%                        |
| <i>Total</i>      | <i>11487</i> | <i>44.82</i> | <i>5.82</i>           | <i>5.82</i>         | <i>3.85</i>           | <i>6.88</i>         | <i>33%</i>     | <i>76%</i>                 |

Categories indicated with the same letter do not differ significantly with  $p$ -value  $< .00004$

(Bonferroni correction =  $p$ -value / amount of tests =  $.001 / 24$ )

Table S2.3

*Distribution of the social needs per age category (weighted)*

| Age category      | N            | M age        | M affection           | M confirmation      | M status          | M happiness         | Percentage men | Percentage higher educated |
|-------------------|--------------|--------------|-----------------------|---------------------|-------------------|---------------------|----------------|----------------------------|
| Emerging adult    | 1502         | 21.5         | 5.68 <sup>a,b</sup>   | 5.46 <sup>a</sup>   | 3.46 <sup>a</sup> | 6.30 <sup>a</sup>   | 44%            | 19%                        |
| Young adult       | 2714         | 32.1         | 5.71 <sup>a</sup>     | 5.56 <sup>a,b</sup> | 3.59 <sup>a</sup> | 6.62 <sup>b</sup>   | 51%            | 45%                        |
| Middle-aged adult | 3700         | 47.5         | 5.53 <sup>a,b,c</sup> | 5.70 <sup>b</sup>   | 3.67 <sup>a</sup> | 6.66 <sup>b</sup>   | 50%            | 36%                        |
| Late adult        | 2567         | 59.1         | 5.38 <sup>b,c</sup>   | 5.67 <sup>b</sup>   | 3.67 <sup>a</sup> | 6.71 <sup>b,c</sup> | 50%            | 28%                        |
| Young old         | 887          | 69.5         | 5.40 <sup>c</sup>     | 5.71 <sup>a,b</sup> | 3.67 <sup>a</sup> | 6.94 <sup>c,d</sup> | 50%            | 25%                        |
| Oldest-old        | 16           | 82.6         | 5.86 <sup>a,b,c</sup> | 5.77 <sup>a,b</sup> | 3.91 <sup>a</sup> | 7.47 <sup>d</sup>   | 71%            | 39%                        |
| <i>Total</i>      | <i>11386</i> | <i>46.48</i> | <i>5.54</i>           | <i>5.63</i>         | <i>3.63</i>       | <i>6.66</i>         | <i>50%</i>     | <i>32%</i>                 |

Categories indicated with the same letter do not differ significantly with  $p$ -value  $< .00004$

(Bonferroni correction =  $p$ -value / amount of tests =  $.001 / 24$ )

The unweighted ANOVA analyses similarly showed small but significant age group differences in affection ( $F_{(5, 11410)} = 15.09, p < .001$ ), behavioral confirmation ( $F_{(5, 11406)} = 7.94, p < .001$ ), and status ( $F_{(5, 11405)} = 16.98, p < .001$ ).
