# Supplementary material for: Social Needs and Happiness: A Life Course Perspective
Source: Springer Nature journal article supplement (doi:10.1007/s10902-020-00287-9), 2020-07-10
Supplement: MOESM3 [file 18171478]

### Supplement 3: Construction of the weights

Table S3

*Population proportions and post-stratification weight factors*

| Strata       | Age      | Gender | Education <sup>a</sup> | Dutch Population |            | Sample         |            | Raw Weight Factor <sup>c</sup> | Truncated Weight <sup>d</sup> |
|--------------|----------|--------|------------------------|------------------|------------|----------------|------------|--------------------------------|-------------------------------|
|              |          |        |                        | N(x1000)         | %          | N <sup>b</sup> | %          |                                |                               |
| 1            | 15 to 25 | Men    | Low                    | 541              | 3.90       | 15             | 0.13       | 29.50                          | 8.00                          |
| 2            |          |        | Middle                 | 426              | 2.99       | 77             | 0.68       | 4.53                           |                               |
| 3            |          |        | High                   | 89               | 0.55       | 172            | 1.51       | 0.42                           |                               |
| 4            |          | Women  | Low                    | 453              | 3.34       | 25             | 0.22       | 14.82                          |                               |
| 5            |          |        | Middle                 | 441              | 3.05       | 301            | 2.64       | 1.20                           |                               |
| 6            |          |        | High                   | 129              | 0.79       | 662            | 5.81       | 0.16                           |                               |
| 7            | 25 to 35 | Men    | Low                    | 165              | 1.24       | 25             | 0.22       | 5.40                           |                               |
| 8            |          |        | Middle                 | 449              | 3.24       | 105            | 0.92       | 3.50                           |                               |
| 9            |          |        | High                   | 440              | 2.81       | 431            | 3.79       | 0.84                           |                               |
| 10           |          | Women  | Low                    | 114              | 0.94       | 30             | 0.26       | 3.11                           |                               |
| 11           |          |        | Middle                 | 390              | 2.90       | 185            | 1.62       | 1.72                           |                               |
| 12           |          |        | High                   | 535              | 3.43       | 1326           | 11.65      | 0.33                           |                               |
| 13           | 35 to 45 | Men    | Low                    | 179              | 1.63       | 32             | 0.28       | 4.58                           |                               |
| 14           |          |        | Middle                 | 419              | 3.54       | 139            | 1.22       | 2.47                           |                               |
| 15           |          |        | High                   | 403              | 2.96       | 438            | 3.85       | 0.75                           |                               |
| 16           |          | Women  | Low                    | 157              | 1.47       | 39             | 0.34       | 3.29                           |                               |
| 17           |          |        | Middle                 | 404              | 3.70       | 199            | 1.75       | 1.66                           |                               |
| 18           |          |        | High                   | 452              | 3.00       | 1043           | 9.16       | 0.35                           |                               |
| 19           | 45 to 55 | Men    | Low                    | 277              | 2.25       | 54             | 0.47       | 4.20                           |                               |
| 20           |          |        | Middle                 | 536              | 3.90       | 155            | 1.36       | 2.83                           |                               |
| 21           |          |        | High                   | 427              | 2.98       | 631            | 5.54       | 0.55                           |                               |
| 22           |          | Women  | Low                    | 280              | 2.47       | 77             | 0.68       | 2.97                           |                               |
| 23           |          |        | Middle                 | 563              | 4.12       | 327            | 2.87       | 1.41                           |                               |
| 24           |          |        | High                   | 398              | 2.45       | 1428           | 12.54      | 0.23                           |                               |
| 25           | 55 to 65 | Men    | Low                    | 309              | 2.18       | 52             | 0.46       | 4.86                           |                               |
| 26           |          |        | Middle                 | 446              | 3.12       | 173            | 1.52       | 2.11                           |                               |
| 27           |          |        | High                   | 346              | 2.49       | 811            | 7.12       | 0.35                           |                               |
| 28           |          | Women  | Low                    | 413              | 3.23       | 118            | 1.04       | 2.86                           |                               |
| 29           |          |        | Middle                 | 428              | 2.79       | 269            | 2.36       | 1.30                           |                               |
| 30           |          |        | High                   | 270              | 1.75       | 1144           | 1.05       | 0.19                           |                               |
| 31           | 65 to 75 | Men    | Low                    | 321              | 2.03       | 30             | 0.26       | 8.75                           | 8.00                          |
| 32           |          |        | Middle                 | 319              | 2.19       | 71             | 0.62       | 3.68                           |                               |
| 33           |          |        | High                   | 246              | 1.53       | 336            | 2.95       | 0.60                           |                               |
| 34           |          | Women  | Low                    | 508              | 3.45       | 45             | 0.40       | 9.23                           |                               |
| 35           |          |        | Middle                 | 268              | 1.77       | 65             | 0.57       | 3.37                           |                               |
| 36           |          |        | High                   | 140              | 0.76       | 283            | 2.49       | 0.40                           |                               |
| 37           | 75+      | Men    | Low                    | 235              | 1.72       | 8              | 0.07       | 24.03                          | 8.00                          |
| 38           |          |        | Middle                 | 183              | 1.34       | 6              | 0.05       | 24.95                          |                               |
| 39           |          |        | High                   | 108              | 0.79       | 30             | 0.26       | 2.94                           |                               |
| 40           |          | Women  | Low                    | 489              | 3.59       | 7              | 0.06       | 57.14                          |                               |
| 41           |          |        | Middle                 | 162              | 1.19       | 8              | 0.07       | 16.56                          |                               |
| 42           |          |        | High                   | 61               | 0.45       | 14             | 0.12       | 3.56                           |                               |
| <i>Total</i> |          |        |                        | <i>13,919</i>    | <i>100</i> | <i>11,386</i>  | <i>100</i> |                                |                               |

---

*Note.* Population scores were derived from the Dutch Governmental Agency for Statistics (Statistics Netherlands, 2018).

<sup>a</sup>Highest level of achieved education: Low refers to elementary school and vocational training (VMBO); Middle refers to the first three years of preparatory middle-level applied education (MBO) and higher general education (Havo/Vwo); High refers to higher education (HBO) and university degree.

<sup>b</sup>The total sample of respondents in this table is 11,386 because 101 respondents did not report their education level.

<sup>c</sup>Post-stratification weights were calculated with formula  $W(ase) = ((NNase/NHase) * (NH/ND))$ , in which  $W(ase)$  refers to the weighting factor for persons in X with age  $a$ , sex  $s$ , and education level  $e$  (Bijl et al., 1998).  $NNase$  refers to the number of persons in the Netherlands with age  $a$ , sex  $s$ , and education level  $e$ , whereas  $NHase$  refers to the number of persons in X with age  $a$ , sex  $s$ , and education level  $e$ .  $NH$  refers to the total number of respondents in X while  $NN$  refers to the total population in the Netherlands.

<sup>d</sup>We truncated the highest post-stratification weights at 8, which reduced the weights for the two low educated youngest strata (strata 1 and 4), the four low educated oldest strata (strata 31, 34, 37 and 40), and for the two middle educated oldest strata (strata 38 and 41).

## References

Bijl, R., Ravelli, A., & van Zessen, G. (1998). Prevalence of psychiatric disorder in the general population: Results of the Netherlands mental health survey and incidence study (NEMESIS). *Social Psychiatry and Psychiatric Epidemiology*, 33(12), 587-595.  
[doi.org/10.1007/s001270050098](https://doi.org/10.1007/s001270050098)

Statistics Netherlands, 2018. *Bevolking; Hoogstbehaald Onderwijsniveau en Onderwijsrichting*.  
<https://opendata.cbs.nl/statline/#/CBS/nl/dataset/82816ned/table?dl=8083>
