# Supplementary material for: Social Needs and Happiness: A Life Course Perspective
Source: Springer Nature journal article supplement (doi:10.1007/s10902-020-00287-9), 2020-07-10
Supplement: MOESM4 [file 18171478]

## Supplement 4: Multi-group cluster analyses

### Table of Contents

|       |                                                                                         |    |
|-------|-----------------------------------------------------------------------------------------|----|
| 4.1   | Summary.....                                                                            | 2  |
| 4.2   | Latent Class Analyses (LCA) with the social needs in the total sample.....              | 4  |
| 4.2.1 | Unweighted cluster analyses with the social needs in the total sample .....             | 4  |
| 4.2.2 | Weighted cluster analyses with the social needs in the total sample .....               | 7  |
| 4.3   | Multi-group LCA (1): Model parameters may differ across the age groups .....            | 9  |
| 4.3.1 | Unweighted multi-group LCA (1): Model parameters may differ across the age groups ..... | 9  |
| 4.3.2 | Weighted multi-group LCA (1): Model parameters may differ across the age groups .....   | 11 |
| 4.4   | Multi-group LCA (2): Cluster sizes may differ across the age groups.....                | 13 |
| 4.4.1 | Unweighted multi-group LCA (2): Cluster sizes may differ across the age groups .....    | 13 |
| 4.4.2 | Weighted multi-group LCA (2): Cluster sizes may differ across the age groups .....      | 16 |
| 4.5   | Multi-group LCA (3): Equality of cluster sizes across age groups.....                   | 19 |
| 4.5.1 | Unweighted multi-group LCA (3): Equality of cluster sizes across age groups .....       | 19 |
| 4.5.2 | Weighted multi-group LCA (3): Equality of cluster sizes across age groups .....         | 19 |
| 4.6   | Latent Class Analyses with the social needs per age group .....                         | 20 |
| 4.6.1 | Emerging adults.....                                                                    | 20 |
| 4.6.2 | Young adults .....                                                                      | 22 |
| 4.6.3 | Middle-aged adults.....                                                                 | 24 |
| 4.6.4 | Late adults .....                                                                       | 26 |
| 4.6.5 | Young old.....                                                                          | 28 |
| 4.7   | Scripts LatentGold: Specifications Cluster analyses .....                               | 30 |
| 4.7.1 | Script for LCA with the social needs in the total sample.....                           | 30 |
| 4.7.2 | Script for weighted LCA .....                                                           | 30 |
| 4.7.3 | Script for Multi-group LCA (1): Model parameters may differ across the age groups.....  | 30 |
| 4.7.4 | Script for Multi-group LCA (2): Unrestricted on cluster size per age group.....         | 31 |
| 4.7.5 | Script for Multi-group LCA (3): Equality of cluster sizes across age groups .....       | 31 |
| 4.7.6 | Scripts for LCA with the social needs per age group .....                               | 32 |

## 4.1 Summary

Distinct social need fulfilment profiles were explored with Latent Class Analyses (LCA) in LatentGOLD (Vermunt & Magidson, 2005). LCA is particularly useful for cluster analyses with a small number of items and a relatively large sample size (Eid, Langeheine, & Diener, 2003). As only 16 participants fell in the oldest-old group, this group was excluded from all cluster analyses. We fitted various types of LCA models, each with 1 up to 10 clusters. For each model, the number of clusters was identified by selecting the model with the lowest BIC value. First, to examine cluster solutions for the general population, the three ordinal social need variables were clustered in the total sample and the weighted sample. Second, the same cluster analyses were performed for the five age groups separately. Third, three multi-group LCA's were performed to examine the differences between age groups in more detail. The first multi-group LCA has an equal number of clusters across all age groups, but the model parameters may differ across the age groups. This analysis gives insight into differences in cluster solutions between the different age groups. The second multi-group LCA is constrained insofar that the association between the latent classes and the social need variables is equal for all age groups, while the cluster sizes may differ across the age groups. In this way, the interpretation of the clusters is equal across the age groups, and we could examine if certain clusters are only present in specific age groups. The last multi-group LCA was most constrained because the equality constraints of the second model were applied extended with the constraint that the cluster sizes are equal across age groups. For this model, we took the same number of clusters as we had identified in the second model. A deviance test was applied to test whether the cluster sizes were equal across age groups. The multi-group LCA's were performed using both the weighted and unweighted sample.

LCA clustering of the social needs in the total sample in general did not reveal disharmonious clusters of need fulfilment. The 6-cluster model fitted best, given the lowest BIC value in both weighted and unweighted analyses with the total sample (Supplement 4.2). People in the clusters only scored generally lower or higher on all needs simultaneously, which indicates that there were no clusters of respondents with disharmonious need fulfilment profiles. Results were similar when all age groups were studied separately, thus lower or higher fulfilment in general, although the number of optimal clusters differed between 4 and 6 (Supplement 4.6). Thus, in these analyses the clusters differed only in their level of the fulfillment of all needs (low to high), and not in terms of different fulfilment levels between needs (one low, one high).

Multi-group LCA clustering of the social needs resulted mainly in clusters of generally low and high profiles of need fulfilment as well. The first multi-group LCA (equal number of clusters, with possibly different model parameters across age groups) revealed that the 4-cluster model fitted best for both the weighted and unweighted analyses. These 4-cluster solutions looked very similar for all age groups, with again only generally lower or higher scores on all social need fulfilments. The second multi-group LCA (with equal associations between latent classes and variables, with possibly varying cluster sizes across age groups) revealed that the 6-cluster and 9-cluster model provided the best fit, for the weighted and unweighted analyses, respectively. Comparing these models with and without equality constraints on the cluster sizes across the age groups (using the deviance test), revealed that the models with varying cluster sizes showed significantly better fit to the data ( $\chi^2 = 142$ ;  $df = 20$ ,  $p < 0.0001$  and  $\chi^2 = 340$ ;  $df = 32$ ,  $p < 0.0001$  for the weighted and unweighted analyses respectively). The models with varying cluster sizes are therefore interpreted below. Next to low and high cluster profiles, we also found clusters with relatively higher levels of affection need fulfilment (see Figure 3). These clusters were most common for emerging and young adults

| Mean levels of social need fulfilment per cluster and percentages of age group members per cluster |                |                |                |                |                |               |
|----------------------------------------------------------------------------------------------------|----------------|----------------|----------------|----------------|----------------|---------------|
|                                                                                                    | Cl. 1<br>(41%) | Cl. 2<br>(22%) | Cl. 3<br>(16%) | Cl. 4<br>(10%) | Cl. 5<br>(10%) | Cl. 6<br>(1%) |
| Affection                                                                                          | 6.17           | 4.69           | 3.79           | 7.77           | 5.82           | 2.29          |
| Confirmation                                                                                       | 6.39           | 4.98           | 3.77           | 7.94           | 5.08           | 1.52          |
| Status                                                                                             | 4.15           | 3.30           | 1.92           | 5.43           | 3.43           | 0.74          |
| Emerging adult                                                                                     | 0.40           | 0.03           | 0.23           | 0.09           | <b>0.23</b>    | 0.02          |
| young adult                                                                                        | 0.35           | 0.13           | 0.16           | 0.10           | <b>0.25</b>    | 0.01          |
| middle adult                                                                                       | 0.45           | <b>0.27</b>    | 0.14           | 0.10           | 0.03           | 0.01          |
| late adult                                                                                         | 0.46           | <b>0.27</b>    | 0.18           | 0.09           | 0.00           | 0.01          |
| young old                                                                                          | 0.39           | <b>0.37</b>    | 0.11           | 0.12           | 0.00           | 0.02          |

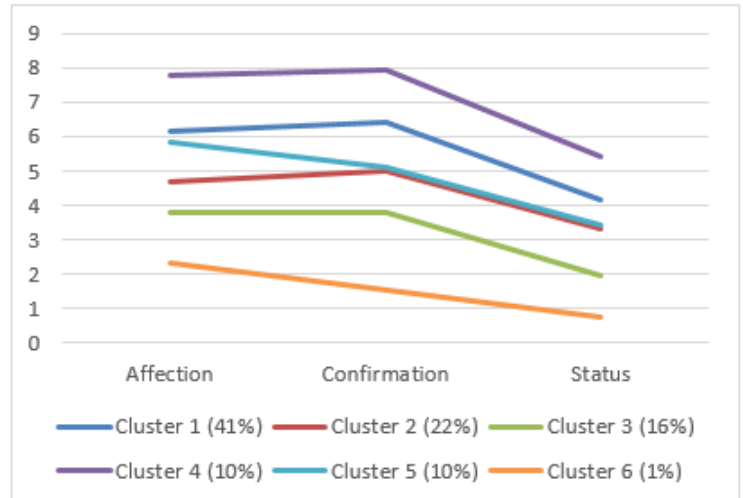

Figure 3. Average levels of social need fulfilment per cluster. Results of best-fitting 6-cluster analysis in the unrestricted multi-group LCA (weighted). Cluster 2 consists mainly of middle adults, late adults, and the young old, while cluster 5 mainly consists of emerging and young adults. More information on the analysis can be found in the Method section.

## 4.2 Latent Class Analyses (LCA) with the social needs in the total sample.

To examine cluster solutions for the general population, the three ordinal social need variables were clustered in the total sample and the weighted sample.

LCA clustering of the social needs in the total sample in general did not reveal disharmonious clusters of need fulfilment. The 6-cluster model fitted best, given the lowest BIC value in both weighted and unweighted analyses with the total sample. People in the clusters only scored generally lower or higher on all needs simultaneously, which indicates that there were no clusters of respondents with disharmonious need fulfilment profiles.

### 4.2.1 Unweighted cluster analyses with the social needs in the total sample

Table 4.2.1

*Goodness-of-fit measures of the 10 investigated cluster models with the three social needs in the total sample (unweighted sample, N = 11,388)*

| Model            | LL <sup>a</sup> | BIC (LL) <sup>b</sup> | N <sub>par</sub> <sup>c</sup> | L <sup>2</sup> <sup>d</sup> | df <sup>e</sup> | p-value <sup>f</sup> | Class.Err <sup>g</sup> |
|------------------|-----------------|-----------------------|-------------------------------|-----------------------------|-----------------|----------------------|------------------------|
| 1-Cluster        | -63078          | 126408                | 27                            | 8910                        | 1179            | <0.001               | 0.00                   |
| 2-Cluster        | -60188          | 120665                | 31                            | 3129                        | 1175            | 0.00                 | 0.08                   |
| 3-Cluster        | -59398          | 119123                | 35                            | 1550                        | 1171            | 0.00                 | 0.12                   |
| 4-Cluster        | -59178          | 118721                | 39                            | 1110                        | 1167            | 0.88                 | 0.16                   |
| 5-Cluster        | -59108          | 118619                | 43                            | 971                         | 1163            | 1.00                 | 0.19                   |
| <b>6-Cluster</b> | <b>-59074</b>   | <b>118588</b>         | <b>47</b>                     | <b>902</b>                  | <b>1159</b>     | <b>1.00</b>          | <b>0.21</b>            |
| 7-Cluster        | -59058          | 118592                | 51                            | 869                         | 1155            | 1.00                 | 0.21                   |
| 8-Cluster        | -59048          | 118610                | 55                            | 849                         | 1151            | 1.00                 | 0.21                   |
| 9-Cluster        | -59031          | 118614                | 59                            | 816                         | 1147            | 1.00                 | 0.24                   |
| 10-Cluster       | -59020          | 118630                | 63                            | 795                         | 1143            | 1.00                 | 0.24                   |

The best fitting model, i.e. with the lowest BIC value, is indicated in bold face.

<sup>a</sup> Log likelihood.

<sup>b</sup> Bayesian Information Criterion based on the log likelihood.

<sup>c</sup> Numbers of parameters in the model.

<sup>d</sup> Model Fit Likelihood ratio chi-squared statistic.

<sup>e</sup> Degrees of freedom in the model

<sup>f</sup> p-value of the L2.

<sup>g</sup> Classification errors.

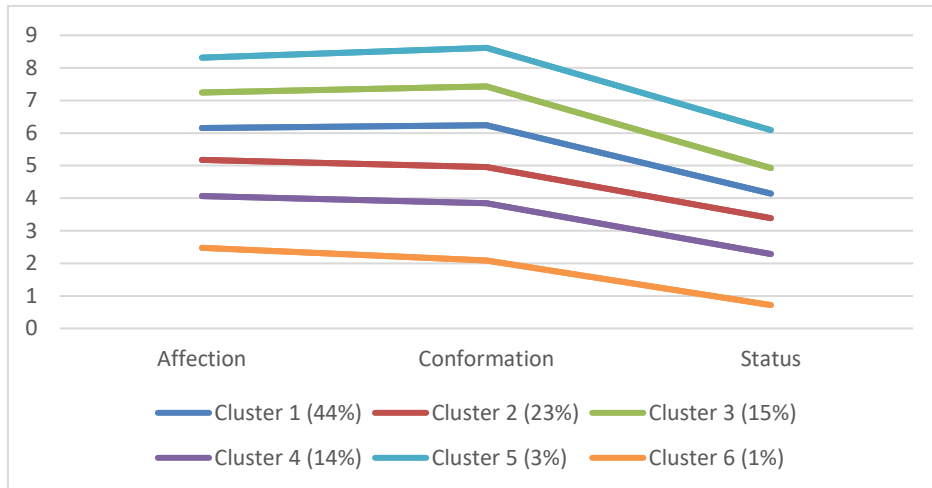

*Figure 4.2.1.* Average levels of social need fulfilment per cluster. Results of best-fitting 6-cluster analysis of the social needs in the total sample (unweighted).

Table 4.2.2

*Response patterns on the social needs per cluster*

|              | Cluster 1           | Cluster 2 | Cluster 3 | Cluster 4 | Cluster 5 | Cluster 6 |
|--------------|---------------------|-----------|-----------|-----------|-----------|-----------|
| Cluster Size | 0.44                | 0.23      | 0.15      | 0.14      | 0.03      | 0.01      |
|              | <u>Affection</u>    |           |           |           |           |           |
| 0            | 0.00                | 0.00      | 0.00      | 0.00      | 0.00      | 0.08      |
| 1            | 0.00                | 0.00      | 0.00      | 0.01      | 0.00      | 0.11      |
| 2            | 0.00                | 0.01      | 0.00      | 0.06      | 0.00      | 0.25      |
| 3            | 0.03                | 0.13      | 0.00      | 0.32      | 0.00      | 0.42      |
| 4            | 0.07                | 0.18      | 0.01      | 0.25      | 0.00      | 0.11      |
| 5            | 0.15                | 0.21      | 0.05      | 0.17      | 0.00      | 0.02      |
| 6            | 0.40                | 0.34      | 0.25      | 0.15      | 0.05      | 0.01      |
| 7            | 0.19                | 0.09      | 0.23      | 0.02      | 0.11      | 0.00      |
| 8            | 0.11                | 0.03      | 0.26      | 0.00      | 0.30      | 0.00      |
| 9            | 0.04                | 0.01      | 0.19      | 0.00      | 0.54      | 0.00      |
| Mean         | 6.15                | 5.17      | 7.24      | 4.06      | 8.31      | 2.48      |
|              | <u>Confirmation</u> |           |           |           |           |           |
| 0            | 0.00                | 0.00      | 0.00      | 0.00      | 0.00      | 0.10      |
| 1            | 0.00                | 0.00      | 0.00      | 0.00      | 0.00      | 0.17      |
| 2            | 0.00                | 0.00      | 0.00      | 0.03      | 0.00      | 0.35      |
| 3            | 0.00                | 0.01      | 0.00      | 0.27      | 0.00      | 0.31      |
| 4            | 0.00                | 0.18      | 0.00      | 0.52      | 0.00      | 0.07      |
| 5            | 0.05                | 0.65      | 0.00      | 0.17      | 0.00      | 0.00      |
| 6            | 0.68                | 0.15      | 0.09      | 0.00      | 0.00      | 0.00      |
| 7            | 0.26                | 0.00      | 0.46      | 0.00      | 0.03      | 0.00      |
| 8            | 0.02                | 0.00      | 0.38      | 0.00      | 0.32      | 0.00      |
| 9            | 0.00                | 0.00      | 0.07      | 0.00      | 0.65      | 0.00      |
| Mean         | 6.24                | 4.96      | 7.43      | 3.84      | 8.61      | 2.08      |
|              | <u>Status</u>       |           |           |           |           |           |
| 0            | 0.00                | 0.02      | 0.00      | 0.12      | 0.00      | 0.54      |
| 1            | 0.02                | 0.06      | 0.01      | 0.17      | 0.00      | 0.27      |
| 2            | 0.06                | 0.12      | 0.03      | 0.21      | 0.00      | 0.11      |
| 3            | 0.30                | 0.40      | 0.17      | 0.36      | 0.05      | 0.07      |
| 4            | 0.23                | 0.21      | 0.19      | 0.10      | 0.09      | 0.01      |
| 5            | 0.17                | 0.11      | 0.21      | 0.03      | 0.16      | 0.00      |
| 6            | 0.18                | 0.07      | 0.30      | 0.01      | 0.39      | 0.00      |
| 7            | 0.02                | 0.01      | 0.06      | 0.00      | 0.12      | 0.00      |
| 8            | 0.01                | 0.00      | 0.03      | 0.00      | 0.10      | 0.00      |
| 9            | 0.00                | 0.00      | 0.01      | 0.00      | 0.09      | 0.00      |
| Mean         | 4.14                | 3.39      | 4.92      | 2.28      | 6.09      | 0.72      |

## 4.2.2 Weighted cluster analyses with the social needs in the total sample

Table 4.2.3

*Goodness-of-fit measures of the 10 investigated cluster models with the three social needs in the total sample (weighted sample, N = 11,293)*

| Model            | LL <sup>a</sup> | BIC (LL) <sup>b</sup> | N <sub>par</sub> <sup>c</sup> | L <sup>2</sup> <sup>d</sup> | df <sup>e</sup> | p-value <sup>f</sup> | Class.Err <sup>g</sup> |
|------------------|-----------------|-----------------------|-------------------------------|-----------------------------|-----------------|----------------------|------------------------|
| 1-Cluster        | -56815          | 113878                | 27                            | 8633                        | 1179            | <0.001               | 0                      |
| 2-Cluster        | -54185          | 108655                | 31                            | 3373                        | 1175            | <0.001               | 0.09                   |
| 3-Cluster        | -53539          | 107401                | 35                            | 2082                        | 1171            | <0.001               | 0.14                   |
| 4-Cluster        | -53361          | 107082                | 39                            | 1726                        | 1167            | <0.001               | 0.18                   |
| 5-Cluster        | -53298          | 106992                | 43                            | 1599                        | 1163            | <0.001               | 0.22                   |
| <b>6-Cluster</b> | <b>-53276</b>   | <b>106984</b>         | <b>47</b>                     | <b>1555</b>                 | <b>1159</b>     | <b>&lt;0.001</b>     | <b>0.27</b>            |
| 7-Cluster        | -53266          | 107003                | 51                            | 1536                        | 1155            | <0.001               | 0.28                   |
| 8-Cluster        | -53259          | 107025                | 55                            | 1521                        | 1151            | <0.001               | 0.34                   |
| 9-Cluster        | -53245          | 107033                | 59                            | 1493                        | 1147            | <0.001               | 0.33                   |
| 10-Cluster       | -53213          | 107007                | 63                            | 1430                        | 1143            | <0.001               | 0.29                   |

The best fitting model, i.e. with the lowest BIC value, is indicated in bold face.

<sup>a</sup> Log likelihood.

<sup>b</sup> Bayesian Information Criterion based on the log likelihood.

<sup>c</sup> Numbers of parameters in the model.

<sup>d</sup> Model Fit Likelihood ratio chi-squared statistic.

<sup>e</sup> Degrees of freedom in the model

<sup>f</sup> p-value of the L2.

<sup>g</sup> Classification errors.

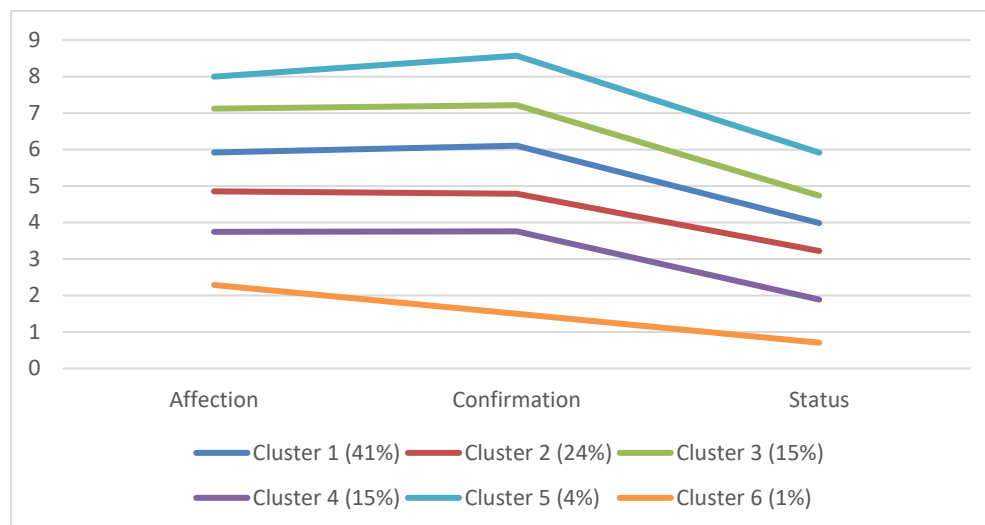

*Figure 4.2.2. Average levels of social need fulfilment per cluster. Results of best-fitting 6-cluster analysis of the social needs in the total sample (weighted).*

Table 4.2.4

*Response patterns on the social needs per cluster*

|              | Cluster 1           | Cluster 2 | Cluster 3 | Cluster 4 | Cluster 5 | Cluster 6 |
|--------------|---------------------|-----------|-----------|-----------|-----------|-----------|
| Cluster Size | 0.41                | 0.24      | 0.15      | 0.15      | 0.04      | 0.01      |
|              | <u>Affection</u>    |           |           |           |           |           |
| 0            | 0.00                | 0.00      | 0.00      | 0.01      | 0.00      | 0.10      |
| 1            | 0.00                | 0.00      | 0.00      | 0.02      | 0.00      | 0.14      |
| 2            | 0.00                | 0.03      | 0.00      | 0.10      | 0.00      | 0.28      |
| 3            | 0.05                | 0.17      | 0.00      | 0.37      | 0.00      | 0.37      |
| 4            | 0.10                | 0.21      | 0.02      | 0.25      | 0.00      | 0.09      |
| 5            | 0.17                | 0.20      | 0.06      | 0.13      | 0.01      | 0.02      |
| 6            | 0.39                | 0.28      | 0.27      | 0.10      | 0.10      | 0.01      |
| 7            | 0.17                | 0.07      | 0.23      | 0.01      | 0.16      | 0.00      |
| 8            | 0.09                | 0.02      | 0.25      | 0.00      | 0.32      | 0.00      |
| 9            | 0.03                | 0.00      | 0.17      | 0.00      | 0.40      | 0.00      |
| Mean         | 5.92                | 4.85      | 7.13      | 3.75      | 8.00      | 2.29      |
|              | <u>Confirmation</u> |           |           |           |           |           |
| 0            | 0.00                | 0.00      | 0.00      | 0.00      | 0.00      | 0.18      |
| 1            | 0.00                | 0.00      | 0.00      | 0.00      | 0.00      | 0.31      |
| 2            | 0.00                | 0.00      | 0.00      | 0.05      | 0.00      | 0.36      |
| 3            | 0.00                | 0.04      | 0.00      | 0.33      | 0.00      | 0.14      |
| 4            | 0.00                | 0.28      | 0.00      | 0.44      | 0.00      | 0.01      |
| 5            | 0.14                | 0.53      | 0.01      | 0.17      | 0.00      | 0.00      |
| 6            | 0.61                | 0.15      | 0.18      | 0.01      | 0.00      | 0.00      |
| 7            | 0.22                | 0.00      | 0.46      | 0.00      | 0.04      | 0.00      |
| 8            | 0.02                | 0.00      | 0.31      | 0.00      | 0.34      | 0.00      |
| 9            | 0.00                | 0.00      | 0.05      | 0.00      | 0.62      | 0.00      |
| Mean         | 6.11                | 4.79      | 7.22      | 3.76      | 8.57      | 1.50      |
|              | <u>Status</u>       |           |           |           |           |           |
| 0            | 0.01                | 0.03      | 0.00      | 0.19      | 0.00      | 0.55      |
| 1            | 0.03                | 0.07      | 0.01      | 0.22      | 0.00      | 0.27      |
| 2            | 0.08                | 0.15      | 0.04      | 0.22      | 0.01      | 0.11      |
| 3            | 0.31                | 0.39      | 0.20      | 0.28      | 0.06      | 0.06      |
| 4            | 0.22                | 0.19      | 0.20      | 0.07      | 0.10      | 0.01      |
| 5            | 0.17                | 0.10      | 0.21      | 0.02      | 0.18      | 0.00      |
| 6            | 0.15                | 0.06      | 0.27      | 0.01      | 0.39      | 0.00      |
| 7            | 0.02                | 0.01      | 0.05      | 0.00      | 0.12      | 0.00      |
| 8            | 0.01                | 0.00      | 0.02      | 0.00      | 0.09      | 0.00      |
| 9            | 0.00                | 0.00      | 0.01      | 0.00      | 0.06      | 0.00      |
| Mean         | 3.98                | 3.22      | 4.74      | 1.89      | 5.92      | 0.71      |



### 4.3 Multi-group LCA (1): Model parameters may differ across the age groups

The first multi-group LCA examined the best cluster solution averaged over all cluster analyses for the age groups separately. Here, the clusters were different for all age groups, so this method gives an idea of how different the cluster solutions are for the different age groups.

Multi-group LCA clustering of the social needs again resulted mainly in clusters of generally high and low profiles of need fulfilment. When using the first multi-group LCA, in order to compare the best-fitting cluster solution for all age groups, the 4-cluster model fitted best for both the weighted and unweighted analyses. These 4-cluster solutions looked very similar for all age groups, with again only generally higher or lower scores on social need fulfilment.

#### 4.3.1 Unweighted multi-group LCA (1): Model parameters may differ across the age groups

Table 4.3.1

*Goodness-of-fit measures of the 10 investigated cluster models in the multi-group LCA where the model parameters may differ across age groups (unweighted sample, N = 11,388)*

| Model            | LL <sup>a</sup> | BIC (LL) <sup>b</sup> | N <sub>par</sub> <sup>c</sup> | L <sup>2</sup> <sup>d</sup> | df <sup>e</sup> | p-value <sup>f</sup> | Class.Err <sup>g</sup> |
|------------------|-----------------|-----------------------|-------------------------------|-----------------------------|-----------------|----------------------|------------------------|
| 1-cluster        | -62884          | 127030                | 135                           | 10937                       | 5166            | <0.001               | 0                      |
| 2-cluster        | -59927          | 121303                | 155                           | 5024                        | 5146            | 0.89                 | 0.08                   |
| 3-cluster        | -59107          | 119850                | 175                           | 3384                        | 5126            | 1                    | 0.12                   |
| <b>4-cluster</b> | <b>-58852</b>   | <b>119528</b>         | <b>195</b>                    | <b>2874</b>                 | <b>5106</b>     | <b>1</b>             | <b>0.15</b>            |
| 5-cluster        | -58785          | 119580                | 215                           | 2740                        | 5086            | 1                    | 0.20                   |
| 6-cluster        | -58737          | 119671                | 235                           | 2643                        | 5066            | 1                    | 0.21                   |
| 7-cluster        | -58701          | 119786                | 255                           | 2571                        | 5046            | 1                    | 0.23                   |
| 8-cluster        | -58658          | 119886                | 275                           | 2484                        | 5026            | 1                    | 0.25                   |
| 9-cluster        | -58637          | 120032                | 295                           | 2443                        | 5006            | 1                    | 0.26                   |

The best fitting model, i.e. with the lowest BIC value, is indicated in bold face.

<sup>a</sup> Log likelihood.

<sup>b</sup> Bayesian Information Criterion based on the log likelihood.

<sup>c</sup> Numbers of parameters in the model.

<sup>d</sup> Model Fit Likelihood ratio chi-squared statistic.

<sup>e</sup> Degrees of freedom in the model

<sup>f</sup> p-value of the L2.

<sup>g</sup> Classification errors.

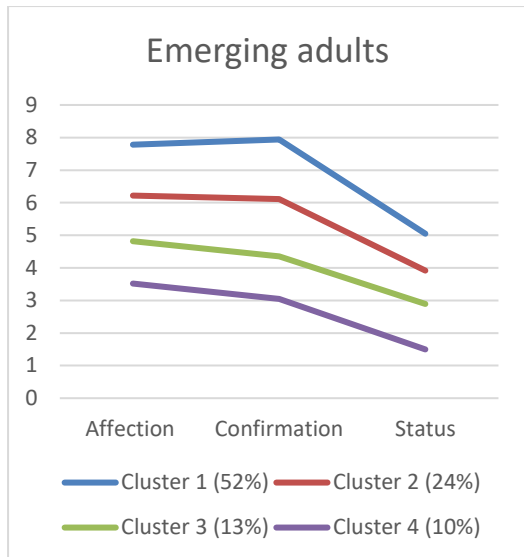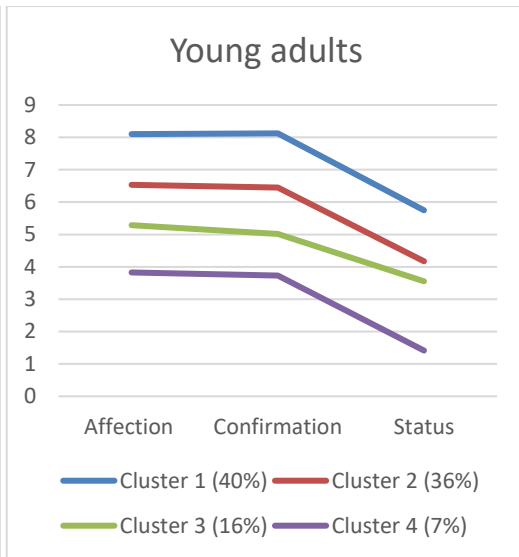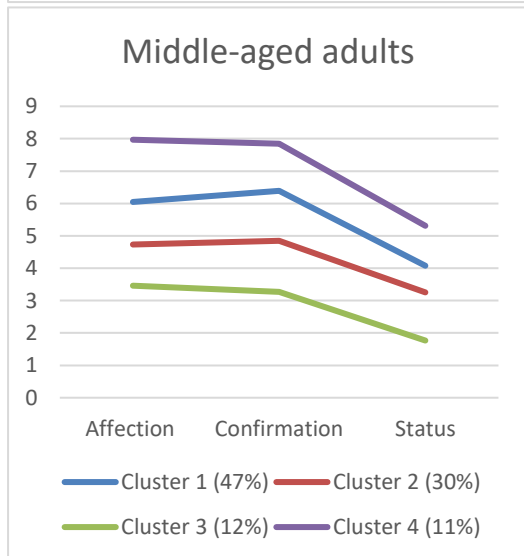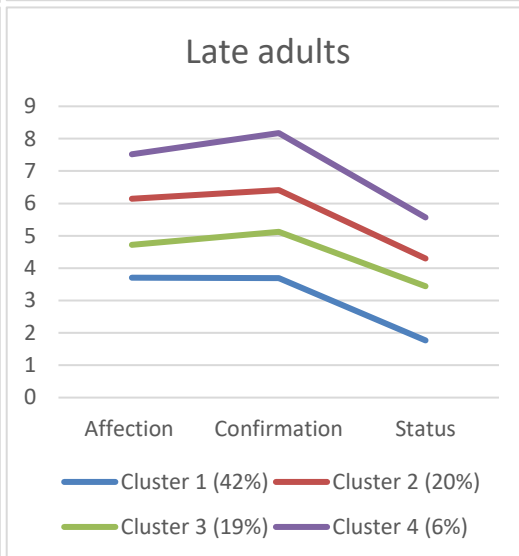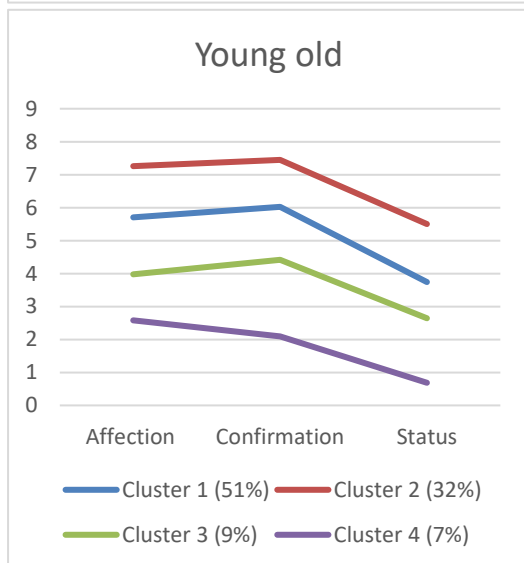

### 4.3.2 Weighted multi-group LCA (1): Model parameters may differ across the age groups

Table 4.3.2

*Goodness-of-fit measures of the 10 investigated cluster models in the multi-group LCA where the model parameters may differ across age groups (weighted sample, N = 11,293)*

| Model            | LL <sup>a</sup> | BIC (LL) <sup>b</sup> | N <sub>par</sub> <sup>c</sup> | L <sup>2</sup> <sup>d</sup> | df <sup>e</sup> | p-value <sup>f</sup> | Class.Err <sup>g</sup> |
|------------------|-----------------|-----------------------|-------------------------------|-----------------------------|-----------------|----------------------|------------------------|
| 1-Cluster        | -56586          | 114418                | 135                           | 12475                       | 5166            | <0.001               | 0                      |
| 2-Cluster        | -53902          | 109232                | 155                           | 7105                        | 5146            | <0.001               | 0.09                   |
| 3-Cluster        | -53229          | 108072                | 175                           | 5760                        | 5126            | <0.001               | 0.13                   |
| <b>4-Cluster</b> | <b>-52997</b>   | <b>107791</b>         | <b>195</b>                    | <b>5295</b>                 | <b>5106</b>     | <b>&lt;0.001</b>     | <b>0.17</b>            |
| 5-Cluster        | -52926          | 107835                | 215                           | 5154                        | 5086            | <0.001               | 0.19                   |
| 6-Cluster        | -52857          | 107880                | 235                           | 5015                        | 5066            | <0.001               | 0.19                   |
| 7-Cluster        | -52753          | 107856                | 255                           | 4807                        | 5046            | <0.001               | 0.19                   |
| 8-Cluster        | -52757          | 108049                | 275                           | 4816                        | 5026            | 0.98                 | 0.25                   |
| 9-Cluster        | -52697          | 108113                | 295                           | 4695                        | 5006            | 1                    | 0.28                   |
| 10-Cluster       | -52673          | 108249                | 315                           | 4647                        | 4986            | 1                    | 0.31                   |

The best fitting model, i.e. with the lowest BIC value, is indicated in bold face.

<sup>a</sup> Log likelihood.

<sup>b</sup> Bayesian Information Criterion based on the log likelihood.

<sup>c</sup> Numbers of parameters in the model.

<sup>d</sup> Model Fit Likelihood ratio chi-squared statistic.

<sup>e</sup> Degrees of freedom in the model

<sup>f</sup> p-value of the L2.

<sup>g</sup> Classification errors.

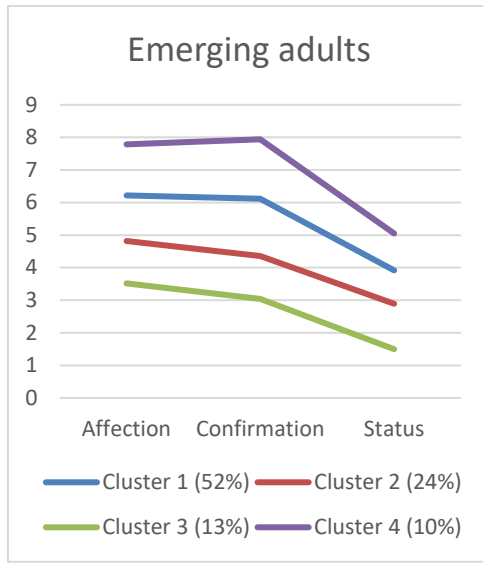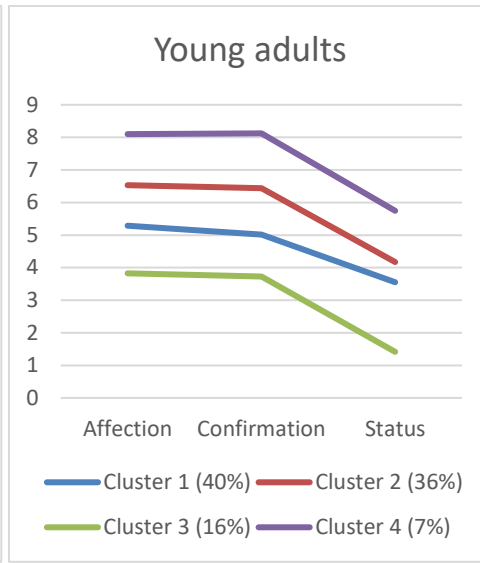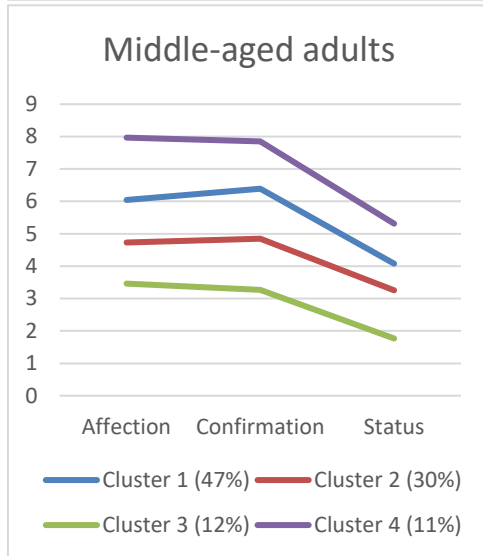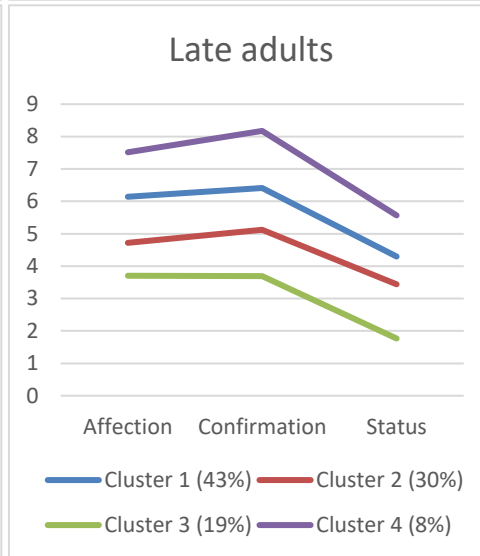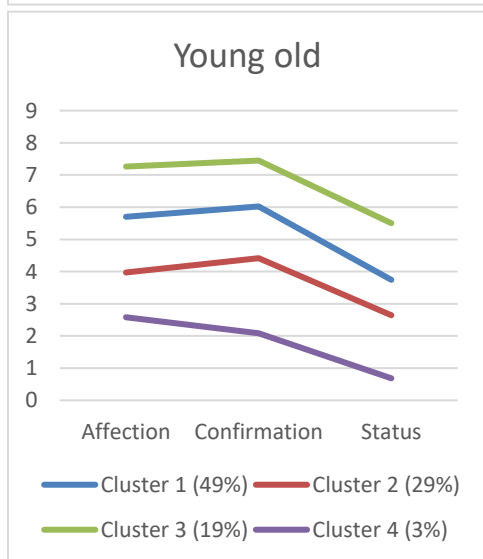

## 4.4 Multi-group LCA (2): Cluster sizes may differ across the age groups

The second multi-group LCA was an unrestricted model where the cluster profiles were allowed to differ in size per age-group. The whole sample was thus divided in the same clusters, but the percentage of people in the clusters differed per age group. In this way we could examine if certain clusters are only (or mostly) present for specific age groups.

In the second multi-group LCA (looking for one cluster solution for all age groups, allowing for a different percentage of age group members per cluster), the 6-cluster and 9-cluster model provided the best fit for the weighted and unweighted sample respectively. Here we found, next to high and low cluster profiles, also clusters with relatively higher levels of affection and lower levels of status fulfilment (see Figure 3). These clusters were most common for emerging and young adults.

### 4.4.1 Unweighted multi-group LCA (2): Cluster sizes may differ across the age groups

Table 4.4.1

*Goodness-of-fit measures of the 10 investigated cluster models in the multi-group LCA where the cluster sizes may differ across age groups (unweighted sample, N = 11,388)*

| Model            | LL <sup>a</sup> | BIC (LL) <sup>b</sup> | N <sub>par</sub> <sup>c</sup> | L <sup>2</sup> <sup>d</sup> | df <sup>e</sup> | p-value <sup>f</sup> | Class.Err <sup>g</sup> |
|------------------|-----------------|-----------------------|-------------------------------|-----------------------------|-----------------|----------------------|------------------------|
| 1-cluster        | -63078          | 126408                | 27                            | 11325                       | 5274            | <0.001               | 0                      |
| 2-cluster        | -60179          | 120684                | 35                            | 5526                        | 5266            | 0.01                 | 0.08                   |
| 3-cluster        | -59389          | 119180                | 43                            | 3947                        | 5258            | 1                    | 0.12                   |
| 4-cluster        | -59160          | 118797                | 51                            | 3489                        | 5250            | 1                    | 0.15                   |
| 5-cluster        | -59054          | 118660                | 59                            | 3278                        | 5242            | 1                    | 0.24                   |
| 6-cluster        | -59010          | 118646                | 67                            | 3189                        | 5234            | 1                    | 0.28                   |
| 7-cluster        | -58948          | 118597                | 75                            | 3065                        | 5226            | 1                    | 0.29                   |
| 8-cluster        | -58908          | 118593                | 83                            | 2986                        | 5218            | 1                    | 0.31                   |
| <b>9-cluster</b> | <b>-58863</b>   | <b>118576</b>         | <b>91</b>                     | <b>2895</b>                 | <b>5210</b>     | <b>1</b>             | <b>0.31</b>            |
| 10-cluster       | -58837          | 118599                | 99                            | 2842                        | 5202            | 1                    | 0.32                   |
| 11-cluster       | -58822          | 118645                | 107                           | 2814                        | 5194            | 1                    | 0.32                   |

The best fitting model, i.e. with the lowest BIC value, is indicated in bold face.

<sup>a</sup> Log likelihood.

<sup>b</sup> Bayesian Information Criterion based on the log likelihood.

<sup>c</sup> Numbers of parameters in the model.

<sup>d</sup> Model Fit Likelihood ratio chi-squared statistic.

<sup>e</sup> Degrees of freedom in the model

<sup>f</sup> p-value of the L2.

<sup>g</sup> Classification errors.

Table 4.4.2

*Cluster profiles of the best-fitting 9-cluster model in the multi-group LCA where the cluster sizes may differ across age groups*

| Age group      | Cluster 1   | Cluster 2 | Cluster 3   | Cluster 4   | Cluster 5   | Cluster 6   | Cluster 7   | Cluster 8 | Cluster 9 |
|----------------|-------------|-----------|-------------|-------------|-------------|-------------|-------------|-----------|-----------|
| emerging adult | 0.22        | 0.12      | <b>0.16</b> | <b>0.22</b> | 0.05        | 0.03        | <b>0.14</b> | 0.04      | 0.02      |
| young adult    | 0.25        | 0.16      | <b>0.17</b> | <b>0.19</b> | 0.04        | 0.02        | <b>0.12</b> | 0.04      | 0.01      |
| middle adult   | <b>0.41</b> | 0.21      | <b>0.10</b> | <b>0.06</b> | <b>0.12</b> | 0.05        | 0.00        | 0.04      | 0.01      |
| late adult     | <b>0.47</b> | 0.23      | 0.05        | 0.00        | <b>0.12</b> | <b>0.11</b> | 0.00        | 0.02      | 0.01      |
| young old      | <b>0.44</b> | 0.28      | 0.02        | 0.00        | <b>0.08</b> | <b>0.14</b> | 0.00        | 0.02      | 0.01      |

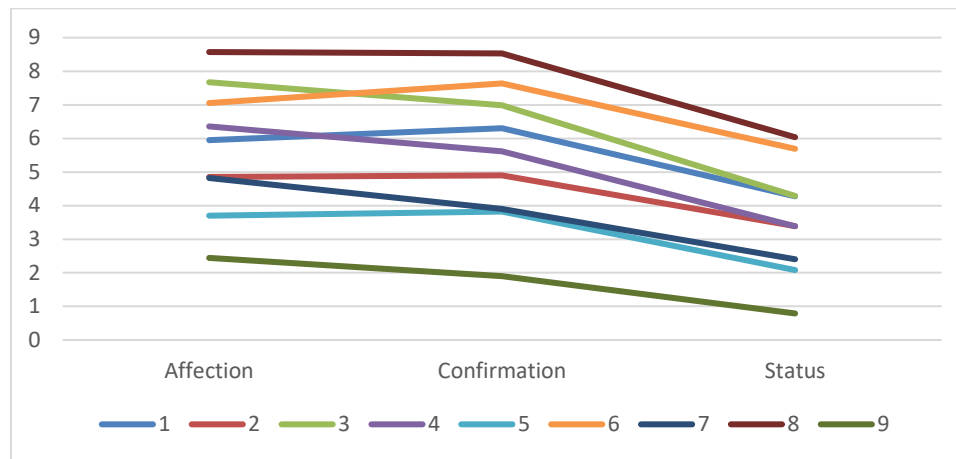

*Figure 4.4.1. Average levels of social need fulfilment per cluster. Results of best-fitting 9-cluster analysis of the multi-group LCA with different cluster sizes across age groups (unweighted).*

Table 4.4.3

*Response patterns on the social needs per cluster*

| Cluster             | 1    | 2    | 3    | 4    | 5    | 6    | 7    | 8    | 9    | Overall |
|---------------------|------|------|------|------|------|------|------|------|------|---------|
| Size                | 0.36 | 0.20 | 0.11 | 0.09 | 0.09 | 0.06 | 0.05 | 0.03 | 0.01 |         |
| <u>Affection</u>    |      |      |      |      |      |      |      |      |      |         |
| 0                   | 0.00 | 0.00 | 0.00 | 0.00 | 0.00 | 0.00 | 0.00 | 0.00 | 0.08 | 0.00    |
| 1                   | 0.00 | 0.00 | 0.00 | 0.00 | 0.02 | 0.00 | 0.00 | 0.00 | 0.11 | 0.00    |
| 2                   | 0.00 | 0.02 | 0.00 | 0.00 | 0.09 | 0.00 | 0.02 | 0.00 | 0.25 | 0.02    |
| 3                   | 0.03 | 0.17 | 0.00 | 0.01 | 0.40 | 0.00 | 0.17 | 0.00 | 0.42 | 0.09    |
| 4                   | 0.08 | 0.22 | 0.00 | 0.04 | 0.26 | 0.01 | 0.22 | 0.00 | 0.10 | 0.11    |
| 5                   | 0.17 | 0.23 | 0.02 | 0.12 | 0.14 | 0.05 | 0.23 | 0.00 | 0.02 | 0.15    |
| 6                   | 0.44 | 0.29 | 0.15 | 0.42 | 0.09 | 0.29 | 0.29 | 0.01 | 0.01 | 0.31    |
| 7                   | 0.18 | 0.06 | 0.22 | 0.23 | 0.01 | 0.27 | 0.06 | 0.06 | 0.00 | 0.15    |
| 8                   | 0.08 | 0.01 | 0.34 | 0.13 | 0.00 | 0.26 | 0.01 | 0.28 | 0.00 | 0.11    |
| 9                   | 0.02 | 0.00 | 0.26 | 0.04 | 0.00 | 0.12 | 0.00 | 0.65 | 0.00 | 0.07    |
| Mean                | 5.95 | 4.85 | 7.67 | 6.36 | 3.70 | 7.06 | 4.82 | 8.57 | 2.44 | 5.82    |
| <u>Confirmation</u> |      |      |      |      |      |      |      |      |      |         |
| 0                   | 0.00 | 0.00 | 0.00 | 0.00 | 0.00 | 0.00 | 0.00 | 0.00 | 0.12 | 0.00    |
| 1                   | 0.00 | 0.00 | 0.00 | 0.00 | 0.00 | 0.00 | 0.00 | 0.00 | 0.19 | 0.00    |
| 2                   | 0.00 | 0.00 | 0.00 | 0.00 | 0.03 | 0.00 | 0.03 | 0.00 | 0.41 | 0.01    |
| 3                   | 0.00 | 0.02 | 0.00 | 0.00 | 0.29 | 0.00 | 0.25 | 0.00 | 0.25 | 0.04    |
| 4                   | 0.00 | 0.23 | 0.00 | 0.03 | 0.50 | 0.00 | 0.51 | 0.00 | 0.03 | 0.12    |
| 5                   | 0.06 | 0.59 | 0.01 | 0.37 | 0.17 | 0.00 | 0.20 | 0.00 | 0.00 | 0.20    |
| 6                   | 0.62 | 0.16 | 0.28 | 0.57 | 0.01 | 0.08 | 0.01 | 0.00 | 0.00 | 0.35    |
| 7                   | 0.28 | 0.00 | 0.46 | 0.04 | 0.00 | 0.35 | 0.00 | 0.06 | 0.00 | 0.18    |
| 8                   | 0.04 | 0.00 | 0.22 | 0.00 | 0.00 | 0.41 | 0.00 | 0.34 | 0.00 | 0.07    |
| 9                   | 0.00 | 0.00 | 0.03 | 0.00 | 0.00 | 0.15 | 0.00 | 0.60 | 0.00 | 0.03    |
| Mean                | 6.30 | 4.90 | 6.98 | 5.61 | 3.82 | 7.64 | 3.90 | 8.53 | 1.90 | 5.82    |
| <u>Status</u>       |      |      |      |      |      |      |      |      |      |         |
| 0                   | 0.00 | 0.02 | 0.00 | 0.02 | 0.15 | 0.00 | 0.10 | 0.00 | 0.51 | 0.03    |
| 1                   | 0.01 | 0.05 | 0.01 | 0.05 | 0.20 | 0.00 | 0.16 | 0.00 | 0.28 | 0.05    |
| 2                   | 0.05 | 0.12 | 0.05 | 0.12 | 0.21 | 0.01 | 0.20 | 0.00 | 0.12 | 0.09    |
| 3                   | 0.28 | 0.41 | 0.28 | 0.41 | 0.33 | 0.07 | 0.38 | 0.05 | 0.08 | 0.30    |
| 4                   | 0.23 | 0.21 | 0.23 | 0.21 | 0.08 | 0.12 | 0.11 | 0.09 | 0.01 | 0.19    |
| 5                   | 0.19 | 0.11 | 0.19 | 0.11 | 0.02 | 0.19 | 0.03 | 0.17 | 0.00 | 0.14    |
| 6                   | 0.20 | 0.07 | 0.20 | 0.07 | 0.01 | 0.40 | 0.01 | 0.41 | 0.00 | 0.15    |
| 7                   | 0.03 | 0.01 | 0.03 | 0.01 | 0.00 | 0.10 | 0.00 | 0.12 | 0.00 | 0.02    |
| 8                   | 0.01 | 0.00 | 0.01 | 0.00 | 0.00 | 0.07 | 0.00 | 0.09 | 0.00 | 0.01    |
| 9                   | 0.00 | 0.00 | 0.00 | 0.00 | 0.00 | 0.04 | 0.00 | 0.07 | 0.00 | 0.01    |
| Mean                | 4.28 | 3.39 | 4.29 | 3.39 | 2.08 | 5.69 | 2.40 | 6.04 | 0.79 | 3.85    |

#### 4.4.2 Weighted multi-group LCA (2): Cluster sizes may differ across the age groups

Table 4.4.4

Goodness-of-fit measures of the 10 investigated cluster models in the multi-group LCA where the model parameters may differ across age groups (weighted sample,  $N = 11,293$ )

| Model            | LL <sup>a</sup> | BIC (LL) <sup>b</sup> | $N_{\text{par}}$ <sup>c</sup> | $L^2$ <sup>d</sup> | $df$ <sup>e</sup> | $p$ -value <sup>f</sup> | Class.Err <sup>g</sup> |
|------------------|-----------------|-----------------------|-------------------------------|--------------------|-------------------|-------------------------|------------------------|
| 1-Cluster        | -56815          | 113878                | 27                            | 12931              | 5274              | <0.001                  | 0                      |
| 2-Cluster        | -54182          | 108686                | 35                            | 7665               | 5266              | <0.001                  | 0.09                   |
| 3-Cluster        | -53532          | 107461                | 43                            | 6366               | 5258              | <0.001                  | 0.14                   |
| 4-Cluster        | -53334          | 107138                | 51                            | 5969               | 5250              | <0.001                  | 0.18                   |
| 5-Cluster        | -53275          | 107094                | 59                            | 5852               | 5242              | <0.001                  | 0.25                   |
| <b>6-Cluster</b> | <b>-53205</b>   | <b>107028</b>         | <b>67</b>                     | <b>5712</b>        | <b>5234</b>       | <b>&lt;0.001</b>        | <b>0.24</b>            |
| 7-Cluster        | -53171          | 107034                | 75                            | 5645               | 5226              | <0.001                  | 0.31                   |
| 8-Cluster        | -53141          | 107047                | 83                            | 5583               | 5218              | 0.00                    | 0.34                   |
| 9-Cluster        | -53111          | 107061                | 91                            | 5524               | 5210              | 0.00                    | 0.33                   |
| 10-Cluster       | -53092          | 107097                | 99                            | 5486               | 5202              | 0.00                    | 0.34                   |

The best fitting model, i.e. with the lowest BIC value, is indicated in bold face.

<sup>a</sup> Log likelihood.

<sup>b</sup> Bayesian Information Criterion based on the log likelihood.

<sup>c</sup> Numbers of parameters in the model.

<sup>d</sup> Model Fit Likelihood ratio chi-squared statistic.

<sup>e</sup> Degrees of freedom in the model

<sup>f</sup>  $p$ -value of the  $L^2$ .

<sup>g</sup> Classification errors.



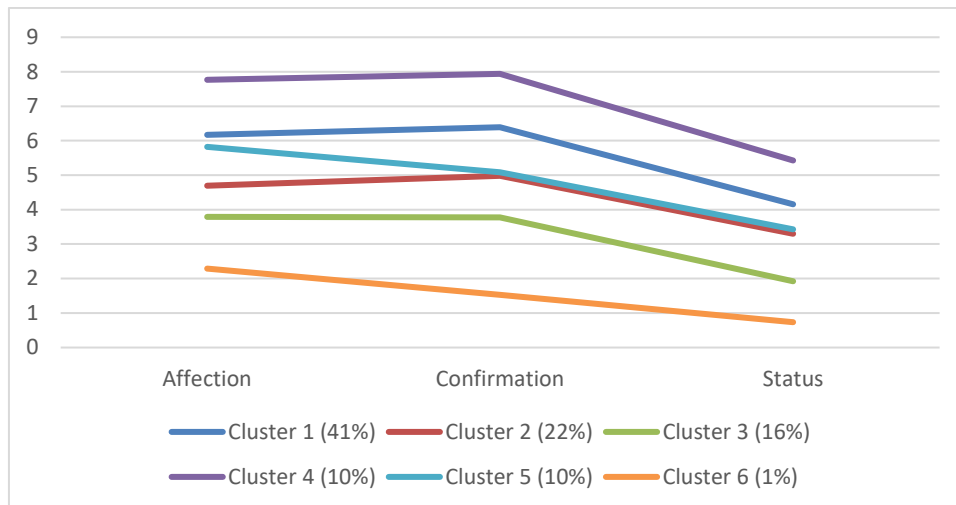

Figure 4.4.2. Average levels of social need fulfilment per cluster. Results of best-fitting 6-cluster analysis of the multi-group LCA with different cluster sizes across age groups (weighted).

Table 4.4.5

Cluster profiles of the best-fitting 6-cluster model in the multi-group LCA where the cluster sizes may differ across age groups

|                | Cluster 1<br>(41%) | Cluster 2<br>(22%) | Cluster 3<br>(16%) | Cluster 4<br>(10%) | Cluster 5<br>(10%) | Cluster 6<br>(1%) |
|----------------|--------------------|--------------------|--------------------|--------------------|--------------------|-------------------|
| Affection      | 6.17               | 4.69               | 3.79               | 7.77               | 5.82               | 2.29              |
| confirmation   | 6.39               | 4.98               | 3.77               | 7.94               | 5.08               | 1.52              |
| status         | 4.15               | 3.30               | 1.92               | 5.43               | 3.43               | 0.74              |
| emerging adult | 0.40               | 0.03               | 0.23               | 0.09               | <b>0.23</b>        | 0.02              |
| young adult    | 0.35               | 0.13               | 0.16               | 0.10               | <b>0.25</b>        | 0.01              |
| middle adult   | 0.45               | <b>0.27</b>        | 0.14               | 0.10               | <b>0.03</b>        | 0.01              |
| late adult     | 0.46               | <b>0.27</b>        | 0.18               | 0.09               | 0.00               | 0.01              |
| young old      | 0.39               | <b>0.37</b>        | 0.11               | 0.12               | 0.00               | 0.02              |

Table 4.4.6

*Response patterns on the social needs per cluster*

| Cluster             | 1    | 2    | 3    | 4    | 5    | 6    | Overall |
|---------------------|------|------|------|------|------|------|---------|
| Size                | 0.41 | 0.22 | 0.16 | 0.10 | 0.10 | 0.01 |         |
| <u>Affection</u>    |      |      |      |      |      |      |         |
| 0                   | 0.00 | 0.00 | 0.00 | 0.00 | 0.00 | 0.10 | 0.00    |
| 1                   | 0.00 | 0.00 | 0.02 | 0.00 | 0.00 | 0.14 | 0.01    |
| 2                   | 0.00 | 0.03 | 0.10 | 0.00 | 0.00 | 0.28 | 0.03    |
| 3                   | 0.03 | 0.20 | 0.36 | 0.00 | 0.05 | 0.37 | 0.12    |
| 4                   | 0.07 | 0.23 | 0.25 | 0.00 | 0.11 | 0.09 | 0.13    |
| 5                   | 0.15 | 0.21 | 0.14 | 0.02 | 0.18 | 0.02 | 0.15    |
| 6                   | 0.39 | 0.26 | 0.11 | 0.15 | 0.39 | 0.01 | 0.29    |
| 7                   | 0.19 | 0.06 | 0.01 | 0.19 | 0.16 | 0.00 | 0.13    |
| 8                   | 0.12 | 0.02 | 0.00 | 0.31 | 0.08 | 0.00 | 0.09    |
| 9                   | 0.05 | 0.00 | 0.00 | 0.33 | 0.03 | 0.00 | 0.05    |
| Mean                | 6.17 | 4.69 | 3.79 | 7.77 | 5.82 | 2.29 | 5.54    |
| <u>Confirmation</u> |      |      |      |      |      |      |         |
| 0                   | 0.00 | 0.00 | 0.00 | 0.00 | 0.00 | 0.17 | 0.00    |
| 1                   | 0.00 | 0.00 | 0.00 | 0.00 | 0.00 | 0.30 | 0.00    |
| 2                   | 0.00 | 0.00 | 0.05 | 0.00 | 0.00 | 0.37 | 0.01    |
| 3                   | 0.00 | 0.03 | 0.33 | 0.00 | 0.02 | 0.14 | 0.06    |
| 4                   | 0.00 | 0.22 | 0.44 | 0.00 | 0.18 | 0.01 | 0.14    |
| 5                   | 0.06 | 0.51 | 0.17 | 0.00 | 0.51 | 0.00 | 0.21    |
| 6                   | 0.55 | 0.24 | 0.01 | 0.05 | 0.28 | 0.00 | 0.31    |
| 7                   | 0.32 | 0.01 | 0.00 | 0.25 | 0.01 | 0.00 | 0.16    |
| 8                   | 0.06 | 0.00 | 0.00 | 0.42 | 0.00 | 0.00 | 0.07    |
| 9                   | 0.00 | 0.00 | 0.00 | 0.28 | 0.00 | 0.00 | 0.03    |
| Mean                | 6.39 | 4.98 | 3.77 | 7.94 | 5.08 | 1.52 | 5.63    |
| <u>Status</u>       |      |      |      |      |      |      |         |
| 0                   | 0.01 | 0.03 | 0.18 | 0.00 | 0.02 | 0.54 | 0.05    |
| 1                   | 0.02 | 0.07 | 0.22 | 0.00 | 0.06 | 0.27 | 0.07    |
| 2                   | 0.07 | 0.14 | 0.22 | 0.01 | 0.13 | 0.12 | 0.11    |
| 3                   | 0.29 | 0.39 | 0.29 | 0.10 | 0.38 | 0.07 | 0.30    |
| 4                   | 0.22 | 0.20 | 0.07 | 0.14 | 0.20 | 0.01 | 0.18    |
| 5                   | 0.18 | 0.11 | 0.02 | 0.20 | 0.12 | 0.00 | 0.13    |
| 6                   | 0.18 | 0.07 | 0.01 | 0.36 | 0.08 | 0.00 | 0.13    |
| 7                   | 0.03 | 0.01 | 0.00 | 0.09 | 0.01 | 0.00 | 0.02    |
| 8                   | 0.01 | 0.00 | 0.00 | 0.06 | 0.00 | 0.00 | 0.01    |
| 9                   | 0.00 | 0.00 | 0.00 | 0.03 | 0.00 | 0.00 | 0.00    |
| Mean                | 4.15 | 3.30 | 1.92 | 5.43 | 3.43 | 0.74 | 3.62    |

## 4.5 Multi-group LCA (3): Equality of cluster sizes across age groups

The last multi-group LCA was the most constrained one, having the same equality constraints as the second plus the constrained that the cluster sizes are equal across age groups. For this model, we took the same number of clusters as identified for the second model. A deviance test was applied to test whether the cluster sizes are equal across age groups.

### 4.5.1 Unweighted multi-group LCA (3): Equality of cluster sizes across age groups

Table 4.5.1

*Goodness-of-fit measures of the 9-cluster model in the multi-group LCA with equality of cluster sizes across age groups (unweighted sample, N = 11,388)*

| Model     | LL <sup>a</sup> | BIC (LL) <sup>b</sup> | N <sub>par</sub> <sup>c</sup> | L <sup>2</sup> <sup>d</sup> | df <sup>e</sup> | p-value <sup>f</sup> | Class.Err <sup>g</sup> |
|-----------|-----------------|-----------------------|-------------------------------|-----------------------------|-----------------|----------------------|------------------------|
| 9-cluster | -59033          | 118618                | 59                            | 3236                        | 5242            | 1                    | 0.24                   |

<sup>a</sup> Log likelihood.

<sup>b</sup> Bayesian Information Criterion based on the log likelihood.

<sup>c</sup> Numbers of parameters in the model.

<sup>d</sup> Model Fit Likelihood ratio chi-squared statistic.

<sup>e</sup> Degrees of freedom in the model

<sup>f</sup> p-value of the L2.

<sup>g</sup> Classification errors.

Comparing the third multi-group model (where cluster sizes differ across age groups) with its constrained version with equality constraints on the cluster sizes across the age group, using the deviance test, revealed that the model with varying cluster sizes fits significantly better ( $\chi^2 = 340$ ;  $df = 32$ ,  $p < 0.0001$ ).

### 4.5.2 Weighted multi-group LCA (3): Equality of cluster sizes across age groups

Table 4.5.2

*Goodness-of-fit measures of the 6-cluster model in the multi-group LCA with equality of cluster sizes across age groups (weighted sample, N = 11,293)*

| Model     | LL <sup>a</sup> | BIC (LL) <sup>b</sup> | N <sub>par</sub> <sup>c</sup> | L <sup>2</sup> <sup>d</sup> | df <sup>e</sup> | p-value <sup>f</sup> | Class.Err <sup>g</sup> |
|-----------|-----------------|-----------------------|-------------------------------|-----------------------------|-----------------|----------------------|------------------------|
| 6-Cluster | -53276          | 106984                | 47                            | 5853                        | 5254            | <0.001               | 0.27                   |

<sup>a</sup> Log likelihood.

<sup>b</sup> Bayesian Information Criterion based on the log likelihood.

<sup>c</sup> Numbers of parameters in the model.

<sup>d</sup> Model Fit Likelihood ratio chi-squared statistic.

<sup>e</sup> Degrees of freedom in the model

<sup>f</sup> p-value of the L2.

<sup>g</sup> Classification errors.

Comparing the third multi-group model (where cluster sizes differ across age groups) with its constrained version with equality constraints on the cluster sizes across the age group, using the deviance test, revealed that the model with varying cluster sizes fits significantly better ( $\chi^2 = 142$ ;  $df = 20$ ,  $p < 0.0001$ ).

## 4.6 Latent Class Analyses with the social needs per age group

Results were similar when all age groups were studied separately, thus lower or higher fulfilment in general, although the number of optimal clusters differed between 4 and 6. Thus, in these analyses the clusters differed only in their level of the fulfilment of all needs (low to high), and not in terms of different fulfilment levels between needs (one low, one high).

### 4.6.1 Emerging adults

Table 4.6.1

*Goodness-of-fit measures of the 10 investigated cluster models with the three social needs for emerging adults only (unweighted sample, N = 1,494)*

| Model            | LL <sup>a</sup> | BIC (LL) <sup>b</sup> | N <sub>par</sub> <sup>c</sup> | L <sup>2</sup> <sup>d</sup> | df <sup>e</sup> | p-value <sup>f</sup> | Class.Err <sup>g</sup> |
|------------------|-----------------|-----------------------|-------------------------------|-----------------------------|-----------------|----------------------|------------------------|
| 1-cluster        | -8499           | 17196                 | 27                            | 1583                        | 972             | <0.001               | 0                      |
| 2-cluster        | -8160           | 16546                 | 31                            | 904                         | 968             | 0.93                 | 0.09                   |
| 3-cluster        | -8051           | 16359                 | 35                            | 687                         | 964             | 1                    | 0.12                   |
| <b>4-cluster</b> | <b>-8022</b>    | <b>16330</b>          | <b>39</b>                     | <b>629</b>                  | <b>960</b>      | <b>1</b>             | <b>0.15</b>            |
| 5-cluster        | -8012           | 16339                 | 43                            | 609                         | 956             | 1                    | 0.17                   |
| 6-cluster        | -8000           | 16345                 | 47                            | 586                         | 952             | 1                    | 0.20                   |
| 7-cluster        | -7992           | 16357                 | 51                            | 568                         | 948             | 1                    | 0.21                   |
| 8-cluster        | -7983           | 16370                 | 55                            | 552                         | 944             | 1                    | 0.20                   |
| 9-cluster        | -7982           | 16397                 | 59                            | 550                         | 940             | 1                    | 0.24                   |
| 10-cluster       | -7973           | 16408                 | 63                            | 532                         | 936             | 1                    | 0.24                   |

The best fitting model, i.e. with the lowest BIC value, is indicated in bold face.

<sup>a</sup> Log likelihood.

<sup>b</sup> Bayesian Information Criterion based on the log likelihood.

<sup>c</sup> Numbers of parameters in the model.

<sup>d</sup> Model Fit Likelihood ratio chi-squared statistic.

<sup>e</sup> Degrees of freedom in the model

<sup>f</sup> p-value of the L2.

<sup>g</sup> Classification errors.

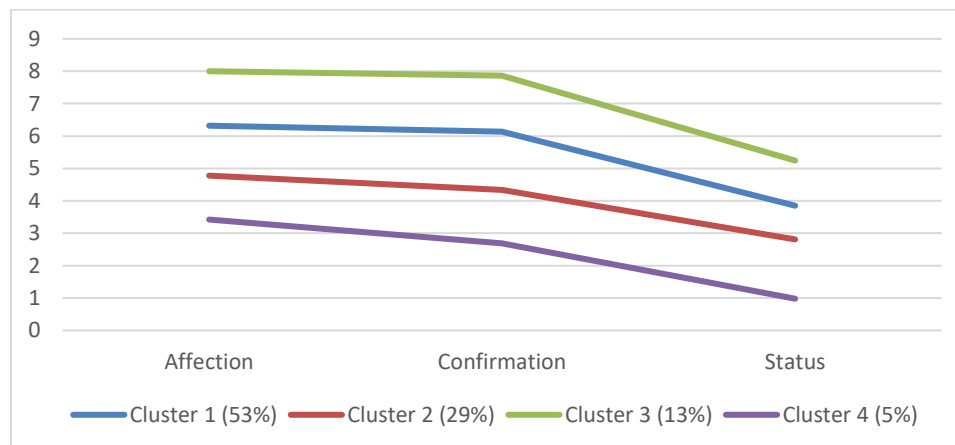

*Figure 4.6.1. Average levels of social need fulfilment per cluster. Results of best-fitting 4-cluster analysis of the social needs in emerging adults (unweighted).*

Table 4.6.2

*Response patterns on the social needs per cluster*

|                     | Cluster 1 | Cluster 2 | Cluster 3 | Cluster 4 | Overall |
|---------------------|-----------|-----------|-----------|-----------|---------|
| Size                | 0.53      | 0.29      | 0.13      | 0.05      |         |
| <u>Affection</u>    |           |           |           |           |         |
| 0                   | 0.00      | 0.00      | 0.00      | 0.01      | 0.00    |
| 1                   | 0.00      | 0.01      | 0.00      | 0.06      | 0.00    |
| 2                   | 0.00      | 0.04      | 0.00      | 0.16      | 0.02    |
| 3                   | 0.02      | 0.17      | 0.00      | 0.35      | 0.08    |
| 4                   | 0.06      | 0.21      | 0.00      | 0.22      | 0.10    |
| 5                   | 0.14      | 0.23      | 0.01      | 0.12      | 0.15    |
| 6                   | 0.36      | 0.25      | 0.09      | 0.07      | 0.28    |
| 7                   | 0.22      | 0.07      | 0.17      | 0.01      | 0.16    |
| 8                   | 0.14      | 0.02      | 0.33      | 0.00      | 0.12    |
| 9                   | 0.05      | 0.00      | 0.39      | 0.00      | 0.08    |
| Mean                | 6.32      | 4.78      | 8.00      | 3.42      | 5.96    |
| <u>Confirmation</u> |           |           |           |           |         |
| 0                   | 0.00      | 0.00      | 0.00      | 0.04      | 0.00    |
| 1                   | 0.00      | 0.00      | 0.00      | 0.11      | 0.01    |
| 2                   | 0.00      | 0.02      | 0.00      | 0.23      | 0.02    |
| 3                   | 0.00      | 0.15      | 0.00      | 0.39      | 0.06    |
| 4                   | 0.01      | 0.38      | 0.00      | 0.19      | 0.12    |
| 5                   | 0.16      | 0.38      | 0.00      | 0.04      | 0.20    |
| 6                   | 0.56      | 0.07      | 0.05      | 0.00      | 0.33    |
| 7                   | 0.24      | 0.00      | 0.26      | 0.00      | 0.16    |
| 8                   | 0.03      | 0.00      | 0.45      | 0.00      | 0.08    |
| 9                   | 0.00      | 0.00      | 0.24      | 0.00      | 0.03    |
| Mean                | 6.13      | 4.34      | 7.87      | 2.68      | 5.68    |
| <u>Status</u>       |           |           |           |           |         |
| 0                   | 0.01      | 0.06      | 0.00      | 0.44      | 0.04    |
| 1                   | 0.04      | 0.11      | 0.01      | 0.28      | 0.07    |
| 2                   | 0.10      | 0.20      | 0.03      | 0.16      | 0.12    |
| 3                   | 0.31      | 0.36      | 0.14      | 0.10      | 0.29    |
| 4                   | 0.24      | 0.17      | 0.18      | 0.02      | 0.20    |
| 5                   | 0.17      | 0.07      | 0.22      | 0.00      | 0.14    |
| 6                   | 0.10      | 0.03      | 0.23      | 0.00      | 0.09    |
| 7                   | 0.02      | 0.00      | 0.08      | 0.00      | 0.02    |
| 8                   | 0.01      | 0.00      | 0.05      | 0.00      | 0.01    |
| 9                   | 0.01      | 0.00      | 0.07      | 0.00      | 0.01    |
| Mean                | 3.85      | 2.81      | 5.24      | 0.98      | 3.60    |

## 4.6.2 Young adults

Table 4.6.3

*Goodness-of-fit measures of the 10 investigated cluster models with the three social needs for young adults only (unweighted sample, N = 2,712)*

| Model            | LL <sup>a</sup> | BIC (LL) <sup>b</sup> | N <sub>par</sub> <sup>c</sup> | L <sup>2</sup> <sup>d</sup> | df <sup>e</sup> | p-value <sup>f</sup> | Class.Err <sup>g</sup> |
|------------------|-----------------|-----------------------|-------------------------------|-----------------------------|-----------------|----------------------|------------------------|
| 1-cluster        | -15026          | 30265                 | 27                            | 2391                        | 972             | <0.001               | 0                      |
| 2-cluster        | -14372          | 28989                 | 31                            | 1083                        | 968             | 0.01                 | 0.09                   |
| 3-cluster        | -14190          | 28657                 | 35                            | 720                         | 964             | 1                    | 0.12                   |
| 4-cluster        | -14134          | 28577                 | 39                            | 608                         | 960             | 1                    | 0.17                   |
| <b>5-cluster</b> | <b>-14105</b>   | <b>28550</b>          | <b>43</b>                     | <b>550</b>                  | <b>956</b>      | <b>1</b>             | <b>0.23</b>            |
| 6-cluster        | -14099          | 28569                 | 47                            | 537                         | 952             | 1                    | 0.24                   |
| 7-cluster        | -14094          | 28590                 | 51                            | 527                         | 948             | 1                    | 0.33                   |
| 8-cluster        | -14090          | 28615                 | 55                            | 520                         | 944             | 1                    | 0.32                   |
| 9-cluster        | -14086          | 28638                 | 59                            | 511                         | 940             | 1                    | 0.34                   |
| 10-cluster       | -14083          | 28663                 | 63                            | 504                         | 936             | 1                    | 0.36                   |

The best fitting model, i.e. with the lowest BIC value, is indicated in bold face.

<sup>a</sup> Log likelihood.

<sup>b</sup> Bayesian Information Criterion based on the log likelihood.

<sup>c</sup> Numbers of parameters in the model.

<sup>d</sup> Model Fit Likelihood ratio chi-squared statistic.

<sup>e</sup> Degrees of freedom in the model

<sup>f</sup> p-value of the L2.

<sup>g</sup> Classification errors.

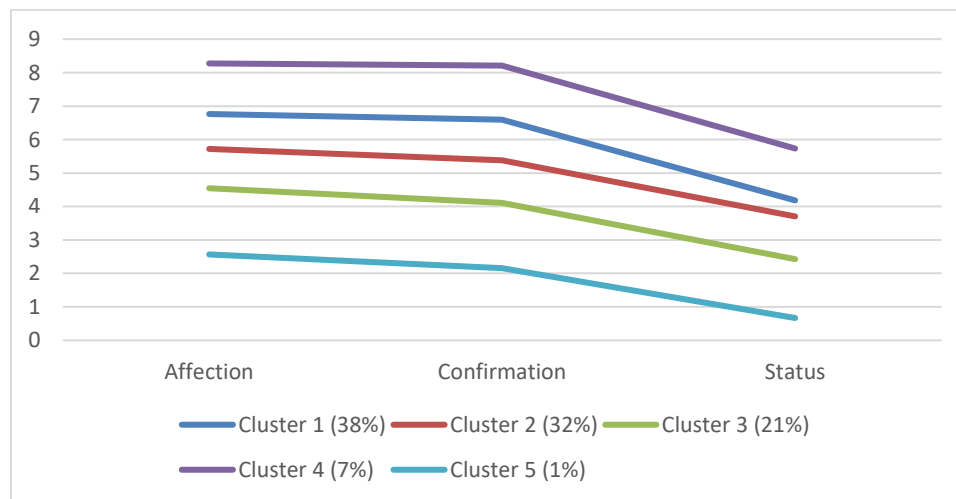

Figure 4.6.2. Average levels of social need fulfilment per cluster. Results of best-fitting 5-cluster analysis of the social needs in young adults (unweighted).

Table 4.6.4

*Response patterns on the social needs per cluster*

|                     | Cluster1 | Cluster2 | Cluster3 | Cluster4 | Cluster5 |
|---------------------|----------|----------|----------|----------|----------|
| Size                | 0.38     | 0.32     | 0.21     | 0.07     | 0.01     |
| <u>Affection</u>    |          |          |          |          |          |
| 0                   | 0.00     | 0.00     | 0.00     | 0.00     | 0.09     |
| 1                   | 0.00     | 0.00     | 0.00     | 0.00     | 0.08     |
| 2                   | 0.00     | 0.00     | 0.03     | 0.00     | 0.23     |
| 3                   | 0.01     | 0.06     | 0.23     | 0.00     | 0.45     |
| 4                   | 0.03     | 0.11     | 0.23     | 0.00     | 0.12     |
| 5                   | 0.09     | 0.19     | 0.21     | 0.00     | 0.03     |
| 6                   | 0.34     | 0.40     | 0.23     | 0.05     | 0.01     |
| 7                   | 0.23     | 0.14     | 0.04     | 0.11     | 0.00     |
| 8                   | 0.20     | 0.07     | 0.01     | 0.32     | 0.00     |
| 9                   | 0.10     | 0.02     | 0.00     | 0.51     | 0.00     |
| Mean                | 6.76     | 5.72     | 4.55     | 8.27     | 2.57     |
| <u>Confirmation</u> |          |          |          |          |          |
| 0                   | 0.00     | 0.00     | 0.00     | 0.00     | 0.12     |
| 1                   | 0.00     | 0.00     | 0.00     | 0.00     | 0.11     |
| 2                   | 0.00     | 0.00     | 0.02     | 0.00     | 0.36     |
| 3                   | 0.00     | 0.00     | 0.18     | 0.00     | 0.31     |
| 4                   | 0.00     | 0.08     | 0.47     | 0.00     | 0.09     |
| 5                   | 0.01     | 0.46     | 0.29     | 0.00     | 0.01     |
| 6                   | 0.49     | 0.44     | 0.03     | 0.02     | 0.00     |
| 7                   | 0.40     | 0.01     | 0.00     | 0.16     | 0.00     |
| 8                   | 0.09     | 0.00     | 0.00     | 0.41     | 0.00     |
| 9                   | 0.01     | 0.00     | 0.00     | 0.41     | 0.00     |
| Mean                | 6.59     | 5.38     | 4.11     | 8.21     | 2.15     |
| <u>Status</u>       |          |          |          |          |          |
| 0                   | 0.00     | 0.01     | 0.09     | 0.00     | 0.56     |
| 1                   | 0.02     | 0.04     | 0.16     | 0.00     | 0.28     |
| 2                   | 0.06     | 0.10     | 0.21     | 0.01     | 0.10     |
| 3                   | 0.29     | 0.36     | 0.37     | 0.07     | 0.05     |
| 4                   | 0.25     | 0.24     | 0.12     | 0.13     | 0.00     |
| 5                   | 0.18     | 0.14     | 0.03     | 0.18     | 0.00     |
| 6                   | 0.17     | 0.10     | 0.01     | 0.35     | 0.00     |
| 7                   | 0.03     | 0.01     | 0.00     | 0.11     | 0.00     |
| 8                   | 0.01     | 0.00     | 0.00     | 0.10     | 0.00     |
| 9                   | 0.00     | 0.00     | 0.00     | 0.04     | 0.00     |
| Mean                | 4.18     | 3.70     | 2.43     | 5.73     | 0.67     |

### 4.6.3 Middle-aged adults

Table 4.6.5

*Goodness-of-fit measures of the 10 investigated cluster models with the three social needs for middle-aged adults only (unweighted sample, N = 3,708)*

| Model            | LL <sup>a</sup> | BIC (LL) <sup>b</sup> | N <sub>par</sub> <sup>c</sup> | L <sup>2</sup> <sup>d</sup> | df <sup>e</sup> | p-value <sup>f</sup> | Class.Err <sup>g</sup> |
|------------------|-----------------|-----------------------|-------------------------------|-----------------------------|-----------------|----------------------|------------------------|
| 1-cluster        | -20400          | 41021                 | 27                            | 3434                        | 972             | <0.001               | 0                      |
| 2-cluster        | -19413          | 39080                 | 31                            | 1460                        | 968             | <0.001               | 0.07                   |
| 3-cluster        | -19124          | 38536                 | 35                            | 883                         | 964             | 0.97                 | 0.12                   |
| 4-cluster        | -19037          | 38394                 | 39                            | 707                         | 960             | 1                    | 0.14                   |
| <b>5-cluster</b> | <b>-19015</b>   | <b>38384</b>          | <b>43</b>                     | <b>665</b>                  | <b>956</b>      | <b>1</b>             | <b>0.15</b>            |
| 6-cluster        | -19009          | 38404                 | 47                            | 652                         | 952             | 1                    | 0.21                   |
| 7-cluster        | -19001          | 38422                 | 51                            | 637                         | 948             | 1                    | 0.28                   |
| 8-cluster        | -18980          | 38412                 | 55                            | 595                         | 944             | 1                    | 0.29                   |
| 9-cluster        | -18968          | 38421                 | 59                            | 570                         | 940             | 1                    | 0.30                   |
| 10-cluster       | -18962          | 38442                 | 63                            | 559                         | 936             | 1                    | 0.30                   |

The best fitting model, i.e. with the lowest BIC value, is indicated in bold face.

<sup>a</sup> Log likelihood.

<sup>b</sup> Bayesian Information Criterion based on the log likelihood.

<sup>c</sup> Numbers of parameters in the model.

<sup>d</sup> Model Fit Likelihood ratio chi-squared statistic.

<sup>e</sup> Degrees of freedom in the model

<sup>f</sup> p-value of the L2.

<sup>g</sup> Classification errors.

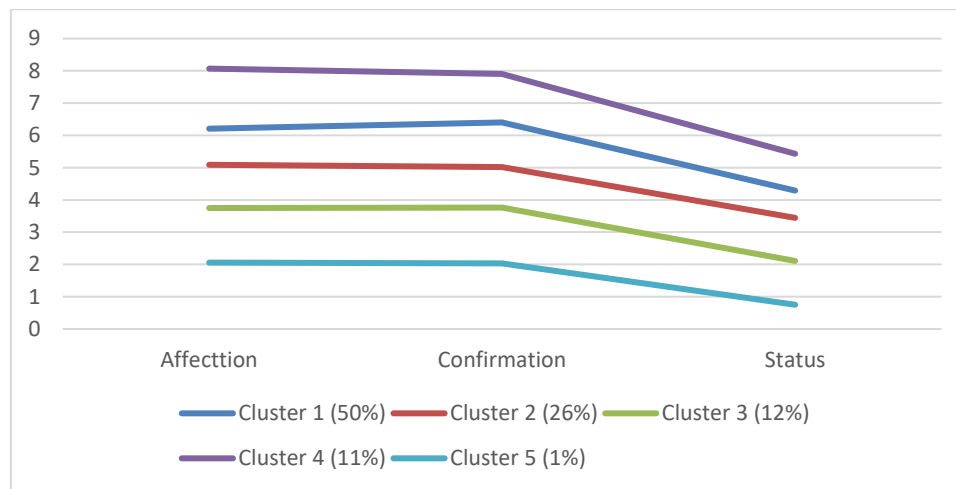

*Figure 4.6.3. Average levels of social need fulfilment per cluster. Results of best-fitting 5-cluster analysis of the social needs in middle-aged adults (unweighted).*



Table 4.6.6

*Response patterns on the social needs per cluster*

|      | Cluster1            | Cluster2 | Cluster3 | Cluster4 | Cluster5 |
|------|---------------------|----------|----------|----------|----------|
| Size | 0.50                | 0.26     | 0.12     | 0.11     | 0.01     |
|      | <u>Affection</u>    |          |          |          |          |
| 0    | 0.00                | 0.00     | 0.00     | 0.00     | 0.14     |
| 1    | 0.00                | 0.00     | 0.02     | 0.00     | 0.19     |
| 2    | 0.00                | 0.01     | 0.08     | 0.00     | 0.25     |
| 3    | 0.02                | 0.13     | 0.39     | 0.00     | 0.35     |
| 4    | 0.07                | 0.19     | 0.26     | 0.00     | 0.07     |
| 5    | 0.14                | 0.21     | 0.13     | 0.01     | 0.01     |
| 6    | 0.41                | 0.33     | 0.10     | 0.08     | 0.00     |
| 7    | 0.20                | 0.08     | 0.01     | 0.15     | 0.00     |
| 8    | 0.12                | 0.03     | 0.00     | 0.34     | 0.00     |
| 9    | 0.04                | 0.00     | 0.00     | 0.42     | 0.00     |
| Mean | 6.21                | 5.09     | 3.75     | 8.07     | 2.06     |
|      | <u>Confirmation</u> |          |          |          |          |
| 0    | 0.00                | 0.00     | 0.00     | 0.00     | 0.12     |
| 1    | 0.00                | 0.00     | 0.00     | 0.00     | 0.14     |
| 2    | 0.00                | 0.00     | 0.03     | 0.00     | 0.37     |
| 3    | 0.00                | 0.01     | 0.31     | 0.00     | 0.32     |
| 4    | 0.00                | 0.17     | 0.51     | 0.00     | 0.05     |
| 5    | 0.03                | 0.63     | 0.14     | 0.00     | 0.00     |
| 6    | 0.61                | 0.20     | 0.00     | 0.06     | 0.00     |
| 7    | 0.30                | 0.00     | 0.00     | 0.25     | 0.00     |
| 8    | 0.06                | 0.00     | 0.00     | 0.41     | 0.00     |
| 9    | 0.00                | 0.00     | 0.00     | 0.28     | 0.00     |
| Mean | 6.40                | 5.02     | 3.76     | 7.91     | 2.03     |
|      | <u>Status</u>       |          |          |          |          |
| 0    | 0.00                | 0.02     | 0.15     | 0.00     | 0.53     |
| 1    | 0.02                | 0.05     | 0.20     | 0.00     | 0.27     |
| 2    | 0.05                | 0.11     | 0.19     | 0.01     | 0.11     |
| 3    | 0.29                | 0.41     | 0.35     | 0.11     | 0.08     |
| 4    | 0.21                | 0.20     | 0.08     | 0.13     | 0.01     |
| 5    | 0.17                | 0.11     | 0.02     | 0.19     | 0.00     |
| 6    | 0.22                | 0.09     | 0.01     | 0.40     | 0.00     |
| 7    | 0.02                | 0.01     | 0.00     | 0.08     | 0.00     |
| 8    | 0.01                | 0.00     | 0.00     | 0.05     | 0.00     |
| 9    | 0.00                | 0.00     | 0.00     | 0.03     | 0.00     |
| Mean | 4.29                | 3.44     | 2.11     | 5.43     | 0.75     |

#### 4.6.4 Late adults

Table 4.6.7

*Goodness-of-fit measures of the 10 investigated cluster models with the three social needs for late adults only (unweighted sample, N = 2,580)*

| Model            | LL <sup>a</sup> | BIC (LL) <sup>b</sup> | N <sub>par</sub> <sup>c</sup> | L <sup>2</sup> <sup>d</sup> | df <sup>e</sup> | p-value <sup>f</sup> | Class.Err <sup>g</sup> |
|------------------|-----------------|-----------------------|-------------------------------|-----------------------------|-----------------|----------------------|------------------------|
| 1-cluster        | -14042          | 28297                 | 27                            | 2459                        | 972             | <0.001               | 0                      |
| 2-cluster        | -13309          | 26862                 | 31                            | 993                         | 968             | 0.28                 | 0.07                   |
| 3-cluster        | -13137          | 26548                 | 35                            | 648                         | 964             | 1                    | 0.13                   |
| <b>4-cluster</b> | <b>-13078</b>   | <b>26463</b>          | <b>39</b>                     | <b>531</b>                  | <b>960</b>      | <b>1</b>             | <b>0.15</b>            |
| 5-cluster        | -13072          | 26481                 | 43                            | 518                         | 956             | 1                    | 0.15                   |
| 6-cluster        | -13064          | 26497                 | 47                            | 502                         | 952             | 1                    | 0.15                   |
| 7-cluster        | -13055          | 26512                 | 51                            | 485                         | 948             | 1                    | 0.25                   |
| 8-cluster        | -13054          | 26540                 | 55                            | 482                         | 944             | 1                    | 0.37                   |
| 9-cluster        | -13044          | 26551                 | 59                            | 462                         | 940             | 1                    | 0.23                   |
| 10-cluster       | -13028          | 26550                 | 63                            | 430                         | 936             | 1                    | 0.17                   |

The best fitting model, i.e. with the lowest BIC value, is indicated in bold face.

<sup>a</sup> Log likelihood.

<sup>b</sup> Bayesian Information Criterion based on the log likelihood.

<sup>c</sup> Numbers of parameters in the model.

<sup>d</sup> Model Fit Likelihood ratio chi-squared statistic.

<sup>e</sup> Degrees of freedom in the model

<sup>f</sup> p-value of the L2.

<sup>g</sup> Classification errors.

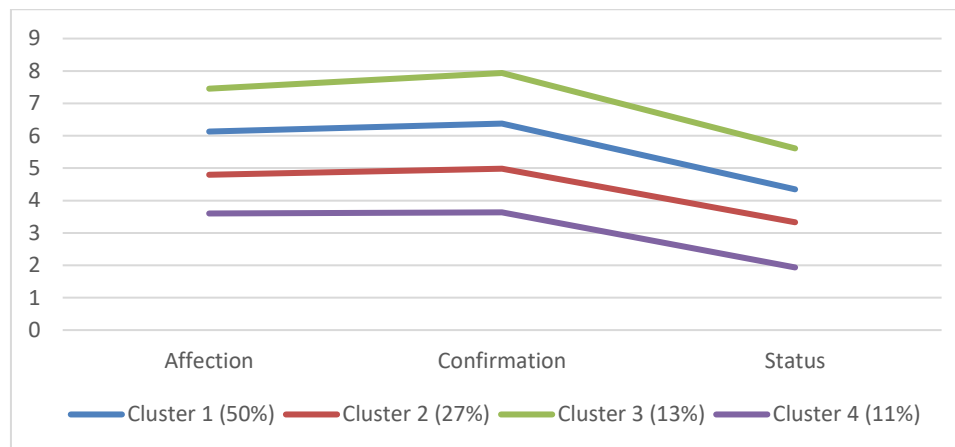

*Figure 4.6.4. Average levels of social need fulfilment per cluster. Results of best-fitting 4-cluster analysis of the social needs in late adults (unweighted).*

Table 4.6.8

*Response patterns on the social needs per cluster*

|                     | Cluster1 | Cluster2 | Cluster3 | Cluster4 |
|---------------------|----------|----------|----------|----------|
| Cluster Size        | 0.50     | 0.27     | 0.13     | 0.11     |
| <u>Affection</u>    |          |          |          |          |
| 0                   | 0.00     | 0.00     | 0.00     | 0.01     |
| 1                   | 0.00     | 0.00     | 0.00     | 0.01     |
| 2                   | 0.00     | 0.02     | 0.00     | 0.09     |
| 3                   | 0.03     | 0.19     | 0.00     | 0.44     |
| 4                   | 0.07     | 0.22     | 0.01     | 0.25     |
| 5                   | 0.15     | 0.21     | 0.03     | 0.12     |
| 6                   | 0.43     | 0.28     | 0.21     | 0.07     |
| 7                   | 0.20     | 0.06     | 0.24     | 0.01     |
| 8                   | 0.10     | 0.01     | 0.28     | 0.00     |
| 9                   | 0.03     | 0.00     | 0.23     | 0.00     |
| Mean                | 6.13     | 4.80     | 7.46     | 3.60     |
| <u>Confirmation</u> |          |          |          |          |
| 0                   | 0.00     | 0.00     | 0.00     | 0.00     |
| 1                   | 0.00     | 0.00     | 0.00     | 0.02     |
| 2                   | 0.00     | 0.00     | 0.00     | 0.04     |
| 3                   | 0.00     | 0.01     | 0.00     | 0.32     |
| 4                   | 0.00     | 0.21     | 0.00     | 0.53     |
| 5                   | 0.03     | 0.58     | 0.00     | 0.09     |
| 6                   | 0.60     | 0.20     | 0.03     | 0.00     |
| 7                   | 0.34     | 0.00     | 0.26     | 0.00     |
| 8                   | 0.03     | 0.00     | 0.47     | 0.00     |
| 9                   | 0.00     | 0.00     | 0.25     | 0.00     |
| Mean                | 6.38     | 4.98     | 7.94     | 3.64     |
| <u>Status</u>       |          |          |          |          |
| 0                   | 0.00     | 0.02     | 0.00     | 0.17     |
| 1                   | 0.01     | 0.05     | 0.00     | 0.22     |
| 2                   | 0.04     | 0.12     | 0.01     | 0.22     |
| 3                   | 0.29     | 0.45     | 0.09     | 0.33     |
| 4                   | 0.21     | 0.19     | 0.12     | 0.06     |
| 5                   | 0.19     | 0.10     | 0.20     | 0.01     |
| 6                   | 0.21     | 0.06     | 0.39     | 0.00     |
| 7                   | 0.03     | 0.00     | 0.09     | 0.00     |
| 8                   | 0.01     | 0.00     | 0.06     | 0.00     |
| 9                   | 0.00     | 0.00     | 0.05     | 0.00     |
| Mean                | 4.35     | 3.33     | 5.61     | 1.93     |

#### 4.6.5 Young old

Table 4.6.9

*Goodness-of-fit measures of the 10 investigated cluster models with the three social needs for the young old only (unweighted sample, N = 894)*

| Model            | LL <sup>a</sup> | BIC (LL) <sup>b</sup> | N <sub>par</sub> <sup>c</sup> | L <sup>2</sup> <sup>d</sup> | df <sup>e</sup> | p-value <sup>f</sup> | Class.Err <sup>g</sup> |
|------------------|-----------------|-----------------------|-------------------------------|-----------------------------|-----------------|----------------------|------------------------|
| 1-cluster        | -4901           | 9985                  | 27                            | 1044                        | 868             | <0.001               | 0                      |
| 2-cluster        | -4659           | 9529                  | 31                            | 561                         | 864             | 1                    | 0.09                   |
| 3-cluster        | -4590           | 9418                  | 35                            | 423                         | 860             | 1                    | 0.13                   |
| <b>4-cluster</b> | <b>-4568</b>    | <b>9400</b>           | <b>39</b>                     | <b>378</b>                  | <b>856</b>      | <b>1</b>             | <b>0.14</b>            |
| 5-cluster        | -4562           | 9417                  | 43                            | 368                         | 852             | 1                    | 0.27                   |
| 6-cluster        | -4557           | 9433                  | 47                            | 356                         | 848             | 1                    | 0.22                   |
| 7-cluster        | -4552           | 9451                  | 51                            | 347                         | 844             | 1                    | 0.22                   |
| 8-cluster        | -4549           | 9471                  | 55                            | 340                         | 840             | 1                    | 0.22                   |
| 9-cluster        | -4550           | 9501                  | 59                            | 343                         | 836             | 1                    | 0.32                   |
| 10-cluster       | -4545           | 9518                  | 63                            | 333                         | 832             | 1                    | 0.28                   |

The best fitting model, i.e. with the lowest BIC value, is indicated in bold face.

<sup>a</sup> Log likelihood.

<sup>b</sup> Bayesian Information Criterion based on the log likelihood.

<sup>c</sup> Numbers of parameters in the model.

<sup>d</sup> Model Fit Likelihood ratio chi-squared statistic.

<sup>e</sup> Degrees of freedom in the model

<sup>f</sup> p-value of the L2.

<sup>g</sup> Classification errors.

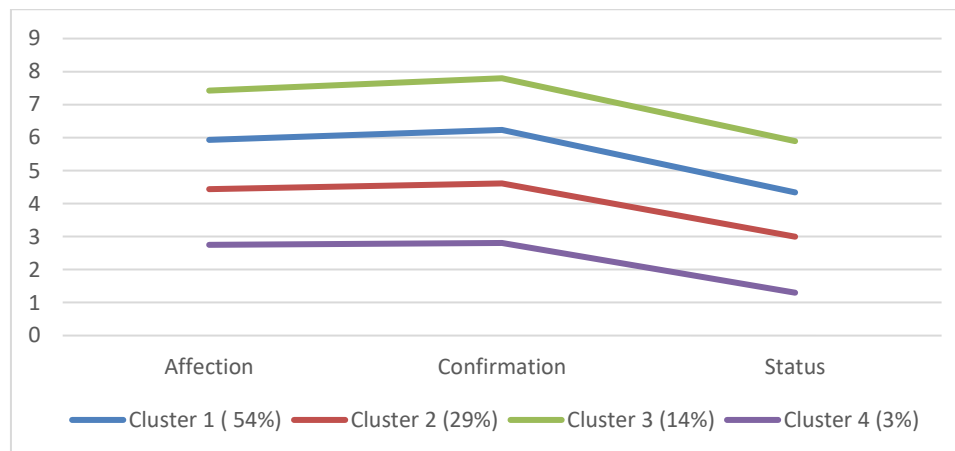

*Figure 4.6.5. Average levels of social need fulfilment per cluster. Results of best-fitting 4-cluster analysis of the social needs in the young old (unweighted).*

Table 4.6.10

*Response patterns on the social needs per cluster*

|                     | Cluster1 | Cluster2 | Cluster3 | Cluster4 |
|---------------------|----------|----------|----------|----------|
| Size                | 0.54     | 0.29     | 0.14     | 0.03     |
| <u>Affection</u>    |          |          |          |          |
| 0                   | 0.00     | 0.00     | 0.00     | 0.03     |
| 1                   | 0.00     | 0.00     | 0.00     | 0.05     |
| 2                   | 0.00     | 0.05     | 0.00     | 0.31     |
| 3                   | 0.03     | 0.22     | 0.00     | 0.41     |
| 4                   | 0.09     | 0.26     | 0.01     | 0.15     |
| 5                   | 0.18     | 0.21     | 0.04     | 0.04     |
| 6                   | 0.45     | 0.22     | 0.24     | 0.01     |
| 7                   | 0.15     | 0.03     | 0.21     | 0.00     |
| 8                   | 0.08     | 0.01     | 0.27     | 0.00     |
| 9                   | 0.03     | 0.00     | 0.25     | 0.00     |
| Mean                | 5.93     | 4.43     | 7.43     | 2.75     |
| <u>Confirmation</u> |          |          |          |          |
| 0                   | 0.00     | 0.00     | 0.00     | 0.04     |
| 1                   | 0.00     | 0.00     | 0.00     | 0.07     |
| 2                   | 0.00     | 0.00     | 0.00     | 0.25     |
| 3                   | 0.00     | 0.06     | 0.00     | 0.38     |
| 4                   | 0.01     | 0.37     | 0.00     | 0.24     |
| 5                   | 0.14     | 0.44     | 0.00     | 0.03     |
| 6                   | 0.52     | 0.12     | 0.06     | 0.00     |
| 7                   | 0.28     | 0.00     | 0.29     | 0.00     |
| 8                   | 0.05     | 0.00     | 0.44     | 0.00     |
| 9                   | 0.00     | 0.00     | 0.21     | 0.00     |
| Mean                | 6.23     | 4.61     | 7.80     | 2.81     |
| <u>Status</u>       |          |          |          |          |
| 0                   | 0.00     | 0.03     | 0.00     | 0.33     |
| 1                   | 0.01     | 0.07     | 0.00     | 0.27     |
| 2                   | 0.04     | 0.17     | 0.00     | 0.20     |
| 3                   | 0.26     | 0.46     | 0.03     | 0.17     |
| 4                   | 0.24     | 0.18     | 0.08     | 0.02     |
| 5                   | 0.21     | 0.07     | 0.19     | 0.00     |
| 6                   | 0.20     | 0.03     | 0.46     | 0.00     |
| 7                   | 0.03     | 0.00     | 0.15     | 0.00     |
| 8                   | 0.00     | 0.00     | 0.05     | 0.00     |
| 9                   | 0.00     | 0.00     | 0.04     | 0.00     |
| Mean                | 4.34     | 3.00     | 5.89     | 1.30     |

## 4.7 Scripts LatentGold: Specifications Cluster analyses

### 4.7.1 Script for LCA with the social needs in the total sample

```
options
  algorithm
    tolerance=1e-008 emtolerance=0.01 emiterations=250 nriterations=50 ;
startvalues
  seed=0 sets=16 tolerance=1e-005 iterations=200;
bayes
  categorical=1 variances=1 latent=1 poisson=1;
montecarlo
  seed=0 sets=0 replicates=500 tolerance=1e-008;
quadrature nodes=10;
missing includeall;
output
  parameters betaopts=wl standarderrors profile probmeans=posterior
  bivariateresiduals iterationdetails estimatedvalues;
variables
  dependent affection ordinal. confirmation ordinal. status ordinal ;
  latent
    Cluster nominal 1 ;
equations
  Cluster <- 1;
  affection <- 1 + Cluster ;
  confirmation <- 1 + Cluster ;
  status <- 1 + Cluster ;
```

### 4.7.2 Script for weighted LCA

The code needed to use the weights based on education, age, and gender is presented in bold face.

```
options
  <similar as above>
variables
  caseweight weight ;
  dependent affection ordinal. confirmation ordinal. status ordinal ;
  latent
    Cluster nominal 1 ;
equations
  <similar as above. depending on cluster model>
```

### 4.7.3 Script for Multi-group LCA (1): Model parameters may differ across the age groups

LCA models are defined for each age group separately, but model determines what is the best cluster solution averaged over all the separate cluster analyses.

```

options
  <similar as above>
variables
independent age_cat nominal;
  dependent affection ordinal. confirmation ordinal. status ordinal ;
  latent
    Cluster nominal 1 ;
equations
Cluster <- 1 | age_cat;
affection <- 1 | age_cat + Cluster | age_cat;
confirmation <- 1 | age_cat + Cluster | age_cat;
status <- 1 | age_cat + Cluster | age_cat;

```

#### 4.7.4 Script for Multi-group LCA (2): Unrestricted on cluster size per age group

LCA models are defined for all age groups, but cluster size is allowed to differ between age groups.

```

options
  <similar as above>
variables
independent age_cat nominal;
  dependent affection ordinal. confirmation ordinal. status ordinal ;
  latent
    Cluster nominal 1 ;
equations
Cluster <- 1 | age_cat;
affection <- 1 + Cluster ;
confirmation <- 1 + Cluster ;
status <- 1 + Cluster ;

```

#### 4.7.5 Script for Multi-group LCA (3): Equality of cluster sizes across age groups

LCA models are defined for the total sample, where the cluster sizes should be similar for every age group.

```

options
  <similar as above>
variables
independent age_cat nominal;
  dependent affection ordinal. confirmation ordinal. status ordinal ;
  latent
    Cluster nominal 1 ;
equations
  Cluster <- 1;
affection <- 1 + Cluster ;
confirmation <- 1 + Cluster ;
status <- 1 + Cluster ;

```

#### 4.7.6 Scripts for LCA with the social needs per age group

LCA models are defined for each age group separately.

```
options
  <similar as above>
variables
  select age_cat = 1 ;
  dependent affection ordinal. confirmation ordinal. status ordinal ;
latent
  Cluster nominal 1 ;
equations
  Cluster <- 1;
  affection <- 1 + Cluster ;
  confirmation <- 1 + Cluster ;
  status <- 1 + Cluster ;
```
