# Supplementary material for: Social Needs and Happiness: A Life Course Perspective
Source: Springer Nature journal article supplement (doi:10.1007/s10902-020-00287-9), 2020-07-10
Supplement: MOESM6 [file 18171478]

## Supplement 6: Unweighted regression analyses

Table S6

Regression analyses on happiness (unweighted, N = 11.410)

| Pred. variable                    | Model 1  |        | Model 2  |        | Model 3  |        | Model 4  |        |
|-----------------------------------|----------|--------|----------|--------|----------|--------|----------|--------|
|                                   | <i>b</i> | (SE)   | <i>b</i> | (SE)   | <i>b</i> | (SE)   | <i>b</i> | (SE)   |
| Intercept                         | 6.88***  | (0.01) | 6.89***  | (0.06) | 6.70***  | (0.07) | 6.69***  | (0.07) |
| Affection                         | 0.32***  | (0.01) | 0.31***  | (0.01) | 0.32***  | (0.01) | 0.35***  | (0.02) |
| Confirmation                      | 0.24***  | (0.01) | 0.23***  | (0.01) | 0.22***  | (0.02) | 0.23***  | (0.03) |
| Status                            | 0.11***  | (0.01) | 0.10***  | (0.01) | 0.10***  | (0.01) | 0.06**   | (0.02) |
| Gender (women)                    |          |        | 0.08**   | (0.03) | 0.04     | (0.03) | 0.05     | (0.03) |
| Medium education <sup>1</sup>     |          |        | 0.14*    | (0.06) | 0.19**   | (0.06) | 0.19**   | (0.06) |
| Higher education                  |          |        | 0.22***  | (0.06) | 0.26***  | (0.06) | 0.26     | (0.06) |
| Affection <sup>2</sup>            |          |        | -0.04*** | (0.00) | -0.04*** | (0.00) | -0.04*** | (0.00) |
| Confirmation <sup>2</sup>         |          |        | -0.03*** | (0.00) | -0.03*** | (0.00) | -0.03*** | (0.00) |
| Status <sup>2</sup>               |          |        | -0.02*** | (0.00) | -0.02*** | (0.00) | -0.02*** | (0.00) |
| Young adult <sup>3</sup> (n=2736) |          |        |          |        | 0.13**   | (0.04) | 0.14**   | (0.04) |
| Middle-aged adult (n=3734)        |          |        |          |        | 0.14***  | (0.04) | 0.15***  | (0.04) |
| Late adult (n=2593)               |          |        |          |        | 0.22***  | (0.04) | 0.23***  | (0.04) |
| Young old (n=899)                 |          |        |          |        | 0.39***  | (0.06) | 0.40***  | (0.06) |
| Oldest-old (n=16)                 |          |        |          |        | 0.59     | (0.34) | 0.63     | (0.34) |
| Affection * Young adult           |          |        |          |        |          |        | -0.05    | (0.03) |
| Affection * Middle adult          |          |        |          |        |          |        | -0.03    | (0.03) |
| Affection * Late adult            |          |        |          |        |          |        | -0.04    | (0.03) |
| Affection * Young old             |          |        |          |        |          |        | -0.03    | (0.04) |
| Affection * Oldest-old            |          |        |          |        |          |        | -0.33    | (0.24) |
| Confirmation * Young adult        |          |        |          |        |          |        | -0.02    | (0.04) |
| Confirmation * Middle adult       |          |        |          |        |          |        | -0.02    | (0.04) |
| Confirmation * Late adult         |          |        |          |        |          |        | 0.04     | (0.04) |
| Confirmation * Young old          |          |        |          |        |          |        | -0.04    | (0.05) |
| Confirmation * Oldest-old         |          |        |          |        |          |        | -0.26    | (0.25) |
| Status * Young adult              |          |        |          |        |          |        | 0.07*    | (0.03) |
| Status * Middle adult             |          |        |          |        |          |        | 0.04     | (0.03) |
| Status * Late adult               |          |        |          |        |          |        | 0.02     | (0.03) |
| Status * Young old                |          |        |          |        |          |        | 0.05     | (0.04) |
| Status * Oldest-old               |          |        |          |        |          |        | 0.06     | (0.27) |
| R <sup>2</sup> <sub>a</sub>       |          | .31*** |          | .32*** |          | .33*** |          | .33*** |

<sup>1</sup>Reference group is lower education; \*\*\*p<.001, \*\*p<.01, \*p<.05

<sup>2</sup>Quadratic term

<sup>3</sup>Reference group is young adults (n=1509);

<sub>a</sub>Adjusted R-squared statistic

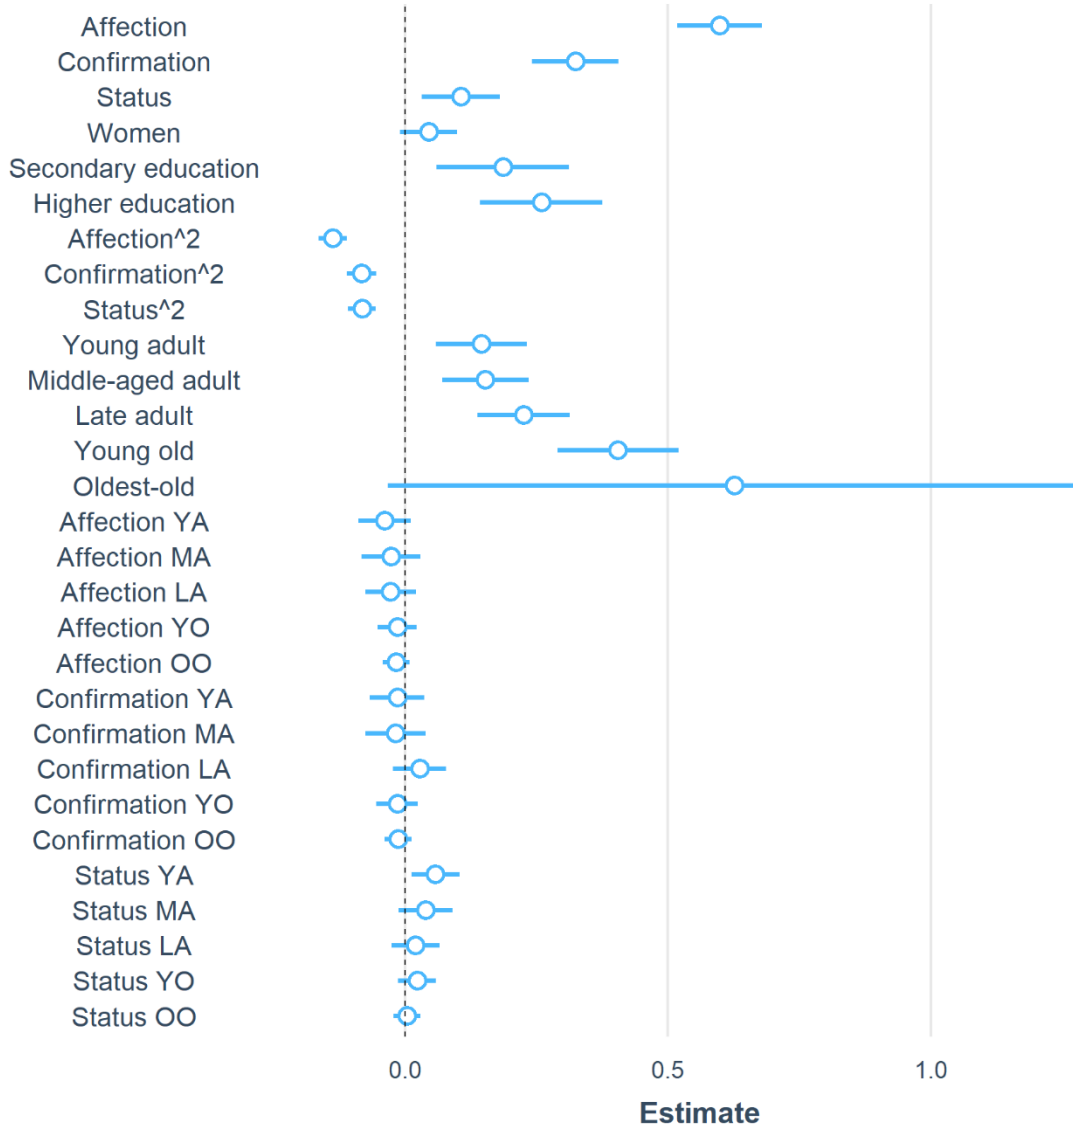

Figure S6. Visualization of the effects from the unweighted regression analysis (Model 4).
