# Supplementary material for: Social Needs and Happiness: A Life Course Perspective
Source: Springer Nature journal article supplement (doi:10.1007/s10902-020-00287-9), 2020-07-10
Supplement: MOESM7 [file 18171478]

## Supplement 7: Results for three age groups

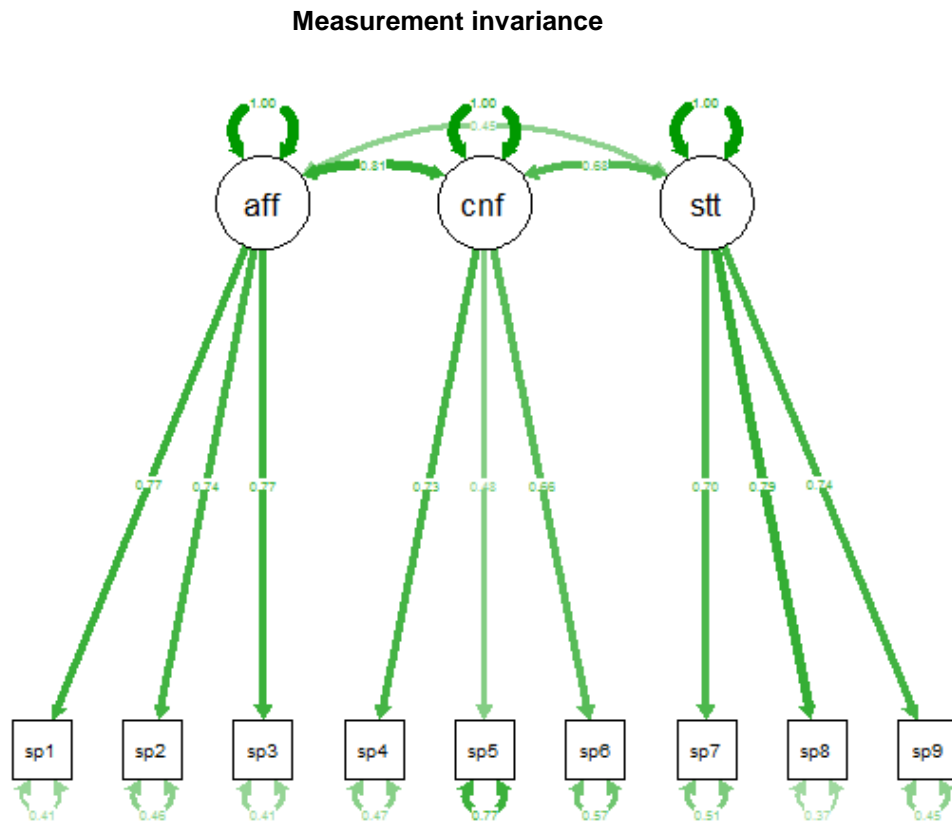

Figure S7.1. A path diagram of Confirmatory Factor Analysis (CFA). Residual variances are fixed to 1.0.

Numbers indicate the standardized parameter estimates as weighted edges.

Table S7.1

Results measurement invariance tests over all age groups

|                                         | X2      | df  | p-value | CFI  | ΔCFI | TLI  | RMSEA | BIC    | AIC    |
|-----------------------------------------|---------|-----|---------|------|------|------|-------|--------|--------|
| Model 1 –<br>Conf. invar.               | 573.01  | 72  | <.001   | .986 |      | .978 | .043  | 169436 | 168775 |
| Model 2 <sup>a</sup> –<br>Metric invar. | 616.52  | 84  | <.001   | .985 | .001 | .980 | .041  | 169367 | 168795 |
| Model 3 <sup>b</sup> –<br>Scalar invar. | 882.96  | 96  | <.001   | .977 | .007 | .975 | .046  | 169522 | 169037 |
| Model 4 <sup>c</sup> –<br>Strict invar. | 1168.04 | 102 | <.001   | .969 | .008 | .968 | .052  | 169751 | 169310 |

<sup>a</sup>Equal loadings; <sup>b</sup>Equal loadings, equal intercepts; <sup>c</sup>Equal loadings, equal intercepts, equal means

## Descriptive statistics

Table S7.2

*Distribution of the social needs per age category*

| Age category | N            | M age        | M affection       | M confirmation      | M status          | M happiness         | Percentage men | Percentage higher educated |
|--------------|--------------|--------------|-------------------|---------------------|-------------------|---------------------|----------------|----------------------------|
| Young adult  | 4245         | 28.51        | 5.99 <sup>a</sup> | 5.71 <sup>a</sup>   | 3.67 <sup>a</sup> | 6.81 <sup>a</sup>   | 26%            | 77%                        |
| Middle adult | 6327         | 52.30        | 5.74 <sup>b</sup> | 5.88 <sup>b</sup>   | 3.93 <sup>b</sup> | 6.90 <sup>a,b</sup> | 35%            | 76%                        |
| Late adult   | 915          | 68.70        | 5.62 <sup>b</sup> | 5.89 <sup>a,b</sup> | 4.08 <sup>b</sup> | 7.11 <sup>b</sup>   | 53%            | 72%                        |
| <i>Total</i> | <i>11487</i> | <i>44.82</i> | <i>5.82</i>       | <i>5.82</i>         | <i>3.85</i>       | <i>6.88</i>         | <i>33%</i>     | <i>76%</i>                 |

Categories indicated with the same letter do not differ significantly with p-value < .00008  
(Bonferroni correction = p-value / amount of tests = .001 / 12)

Table S7.3

*Distribution of the social needs per age category (weighted)*

| Age category | N            | M age        | M affection       | M confirmation      | M status          | M happiness       | Percentage men | Percentage higher educated |
|--------------|--------------|--------------|-------------------|---------------------|-------------------|-------------------|----------------|----------------------------|
| Young adult  | 4216         | 28.04        | 5.70 <sup>a</sup> | 5.52 <sup>a</sup>   | 3.54 <sup>a</sup> | 6.50 <sup>a</sup> | 48%            | 31%                        |
| Middle adult | 6267         | 51.89        | 5.47 <sup>b</sup> | 5.68 <sup>b</sup>   | 3.67 <sup>a</sup> | 6.68 <sup>b</sup> | 50%            | 25%                        |
| Late adult   | 903          | 70.06        | 5.42 <sup>b</sup> | 5.71 <sup>a,b</sup> | 3.68 <sup>a</sup> | 6.96 <sup>c</sup> | 51%            | 50%                        |
| <i>Total</i> | <i>11386</i> | <i>46.48</i> | <i>5.54</i>       | <i>5.63</i>         | <i>3.63</i>       | <i>6.66</i>       | <i>50%</i>     | <i>32%</i>                 |

Categories indicated with the same letter do not differ significantly with p-value < .00008  
(Bonferroni correction = p-value / amount of tests = .001 / 12)

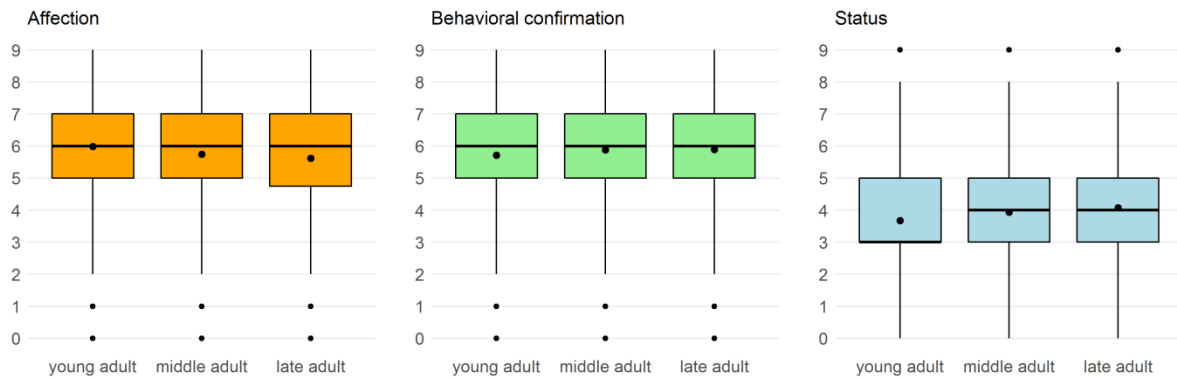

Figure 5. Boxplots of the social needs per age group. The black dots in the middle indicate the means.

### ANOVA results

To examine age group differences in the average levels of social need fulfilment, ANOVA analyses were performed. Our models showed small but significant age group differences in affection ( $F_{(2, 11413)} = 33.13, p < .001$ ), behavioral confirmation ( $F_{(2, 11409)} = 18.05, p < .001$ ), and status ( $F_{(2, 11408)} = 38.42, p < .001$ ; see Supplement 2 for details). These differences were marginal as the maximum difference comprised 0.48 on a 9-point scale. Young adults reported slightly higher fulfilment of affection than middle ( $d = 0.13, M_y = 5.99, M_m = 5.74$ ) and late adults ( $d = 0.20, M_l = 5.62$ ), lower levels of behavioral confirmation than middle adults ( $d = -0.10, M_y = 5.71, M_m = 5.88$ ) and lower levels of status than middle ( $d = -0.14, M_y = 3.67, M_m = 3.93$ ) and late adults ( $d = -0.22, M_l = 4.08$ ).

The weighted ANOVA analyses showed comparable age group differences in social need fulfilment for affection ( $F_{(2, 11312)} = 23.63, p < .001$ ), behavioral confirmation ( $F_{(2, 11308)} = 17.05, p < .001$ ), and status ( $F_{(2, 11307)} = 7.50, p = .001$ ; see Supplement 2 for details). After weighting differences in status fulfilment lost their significance.

## Regression analyses

Table S7.4

*Regression analyses on happiness. Weighted by age, gender and education level (N = 11,386).*

| Pred. variable                     | Model 1  |        | Model 2  |        | Model 3  |        | Model 4  |        |
|------------------------------------|----------|--------|----------|--------|----------|--------|----------|--------|
|                                    | <i>b</i> | (SE)   | <i>b</i> | (SE)   | <i>b</i> | (SE)   | <i>b</i> | (SE)   |
| Intercept                          | 6.83***  | (0.01) | 6.79***  | (0.05) | 6.66***  | (0.02) | 6.51***  | (0.05) |
| Affection                          | 0.35***  | (0.01) | 0.32***  | (0.01) | 0.36***  | (0.02) | 0.33***  | (0.02) |
| Confirmation                       | 0.23***  | (0.01) | 0.21***  | (0.01) | 0.25***  | (0.02) | 0.22***  | (0.02) |
| Status                             | 0.13***  | (0.01) | 0.11***  | (0.01) | 0.12***  | (0.02) | 0.11***  | (0.02) |
| Gender (women)                     |          |        | 0.03     | (0.03) |          |        | 0.02     | (0.03) |
| Education level                    |          |        | 0.12***  | (0.02) |          |        | 0.16***  | (0.02) |
| Affection <sup>2</sup>             |          |        | -0.03*** | (0.00) |          |        | -0.03*** | (0.00) |
| Confirmation <sup>2</sup>          |          |        | -0.03*** | (0.00) |          |        | -0.03*** | (0.00) |
| Status <sup>2</sup>                |          |        | -0.02*** | (0.00) |          |        | -0.02*** | (0.00) |
| Middle adult <sup>1</sup> (n=6267) |          |        |          |        | 0.19***  | (0.03) | 0.20**   | (0.03) |
| Late adult (n=903)                 |          |        |          |        | 0.51***  | (0.04) | 0.55***  | (0.04) |
| Affection * Middle adult           |          |        |          |        | -0.01    | (0.02) | -0.01    | (0.02) |
| Affection * Late adult             |          |        |          |        | 0.03     | (0.03) | 0.03     | (0.03) |
| Confirmation * Middle adult        |          |        |          |        | -0.02    | (0.03) | -0.01    | (0.03) |
| Confirmation * Late adult          |          |        |          |        | -0.14*** | (0.04) | -0.12*** | (0.04) |
| Status * Middle adult              |          |        |          |        | -0.01    | (0.02) | -0.02    | (0.02) |
| Status * Late adult                |          |        |          |        | 0.05     | (0.03) | 0.03     | (0.03) |
| R <sup>2</sup> <sub>a</sub>        | .30***   |        | .32***   |        | .31***   |        | .33***   |        |

<sup>1</sup>Reference group is emerging adults (n = 4216); \*\*\**p* < .001, \*\**p* < .01, \**p* < .05

<sup>2</sup>Quadratic term

<sub>a</sub>Adjusted R-squared statistic

Table S7.5  
*Regression analyses on happiness (unweighted)*

| Pred. variable                     | Model 1  |       | Model 2  |       | Model 3  |       | Model 4  |       |
|------------------------------------|----------|-------|----------|-------|----------|-------|----------|-------|
|                                    | <i>b</i> | (SE)  | <i>b</i> | (SE)  | <i>b</i> | (SE)  | <i>b</i> | (SE)  |
| Intercept                          | 6.88***  | (.01) | 6.81***  | (.07) | 6.80***  | (.02) | 6.72***  | (.07) |
| Affection                          | .32***   | (.01) | .31***   | (.01) | .33***   | (.01) | .32***   | (.01) |
| Confirmation                       | .24***   | (.01) | .23***   | (.01) | .23***   | (.02) | .21***   | (.02) |
| Status                             | .11***   | (.01) | .10***   | (.01) | .11***   | (.01) | .11***   | (.01) |
| Gender (women)                     |          |       | .08**    | (.03) |          |       | .05      | (.03) |
| Education level                    |          |       | .10***   | (.02) |          |       | .11***   | (.02) |
| Affection <sup>2</sup>             |          |       | -.04***  | (.00) |          |       | -.04***  | (.00) |
| Confirmation <sup>2</sup>          |          |       | -.03***  | (.00) |          |       | -.03***  | (.00) |
| Status <sup>2</sup>                |          |       | -.02***  | (.00) |          |       | -.02***  | (.00) |
| Middle adult <sup>1</sup> (n=6327) |          |       |          |       | .10***   | (.03) | .09**    | (.03) |
| Late adult (n=915)                 |          |       |          |       | .33***   | (.05) | .31***   | (.05) |
| Affection * Middle adult           |          |       |          |       | .00      | (.02) | -.00     | (.02) |
| Affection * Late adult             |          |       |          |       | -.00     | (.04) | -.01     | (.04) |
| Confirmation * Middle adult        |          |       |          |       | .01      | (.02) | .02      | (.02) |
| Confirmation * Late adult          |          |       |          |       | -.04     | (.05) | -.03     | (.04) |
| Status * Middle adult              |          |       |          |       | -.01     | (.02) | -.01     | (.02) |
| Status * Late adult                |          |       |          |       | .01      | (.04) | .01      | (.04) |
| R <sup>2</sup> <sub>a</sub>        | .31***   |       | .32***   |       | .31***   |       | .33***   |       |

<sup>1</sup>Reference group is young adults (n=4245); \*\*\*p<.001, \*\*p<.01, \*p<.05

### Cluster analyses

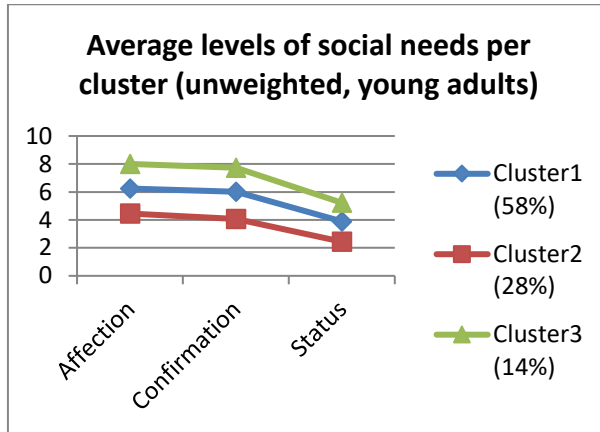

Figure 7.2. Results of cluster analysis in young adults.

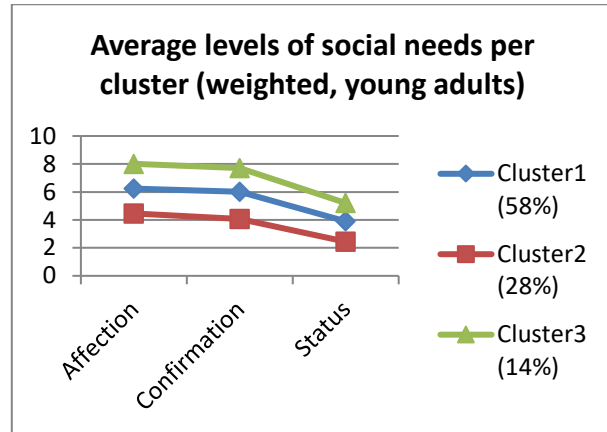

Figure 7.3. Results of weighted cluster analysis in young adults.

Table S7.6

Goodness-of-fit measures of the 10 investigated cluster models with the **three social needs for young adults (unweighted sample, n = 4,245)**

|                            | $N_{par}$ | $L^2$      | $df$       | $p$ -value | LL            | BIC (LL)     | Class.Err  |
|----------------------------|-----------|------------|------------|------------|---------------|--------------|------------|
| One-cluster model          | 27        | 3499       | 972        | <.001      | -23552        | 47329        | 0          |
| Two-cluster model          | 31        | 1515       | 968        | <.001      | -22560        | 45378        | .09        |
| <b>Three-cluster model</b> | <b>35</b> | <b>936</b> | <b>964</b> | <b>.74</b> | <b>-22270</b> | <b>44833</b> | <b>.12</b> |
| Four-cluster model         | 39        | 767        | 960        | 1          | -22186        | 44697        | .14        |
| Five-cluster model         | 43        | 710        | 956        | 1          | -22157        | 44673        | .21        |
| Six-cluster model          | 47        | 679        | 952        | 1          | -22142        | 44676        | .21        |
| Seven-cluster model        | 51        | 658        | 948        | 1          | -22131        | 44688        | .26        |
| Eight-cluster model        | 55        | 646        | 944        | 1          | -22125        | 44709        | .27        |
| Nine-cluster model         | 59        | 634        | 940        | 1          | -22119        | 44731        | .32        |
| Ten-cluster model          | 63        | 624        | 936        | 1          | -22114        | 44754        | .33        |

Table S7.7

Goodness-of-fit measures of the 10 investigated cluster models with the **three social needs for young adults (weighted sample, n = 4,216)**

|                            | $N_{par}$ | $L^2$      | $df$       | $p$ -value | LL            | BIC (LL)     | Class.Err  |
|----------------------------|-----------|------------|------------|------------|---------------|--------------|------------|
| One-cluster model          | 27        | 3464       | 972        | <.001      | -23361        | 46947        | 0          |
| Two-cluster model          | 31        | 1491       | 968        | <.001      | -22375        | 45008        | .09        |
| <b>Three-cluster model</b> | <b>35</b> | <b>918</b> | <b>964</b> | <b>.85</b> | <b>-22088</b> | <b>44468</b> | <b>.12</b> |
| Four-cluster model         | 39        | 758        | 960        | 1          | -22008        | 44341        | .14        |
| Five-cluster model         | 43        | 701        | 956        | 1          | -21980        | 44318        | .21        |
| Six-cluster model          | 47        | 670        | 952        | 1          | -21964        | 44321        | .21        |
| Seven-cluster model        | 51        | 650        | 948        | 1          | -21954        | 44334        | .27        |
| Eight-cluster model        | 55        | 640        | 944        | 1          | -21949        | 44358        | .27        |
| Nine-cluster model         | 59        | 625        | 940        | 1          | -21942        | 44375        | .32        |
| Ten-cluster model          | 63        | 616        | 936        | 1          | -21937        | 44400        | .32        |

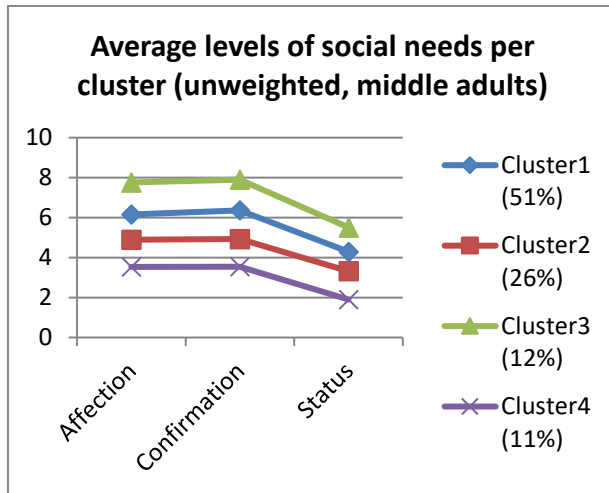

Figure 7.4. Results of cluster analysis in middle adults.

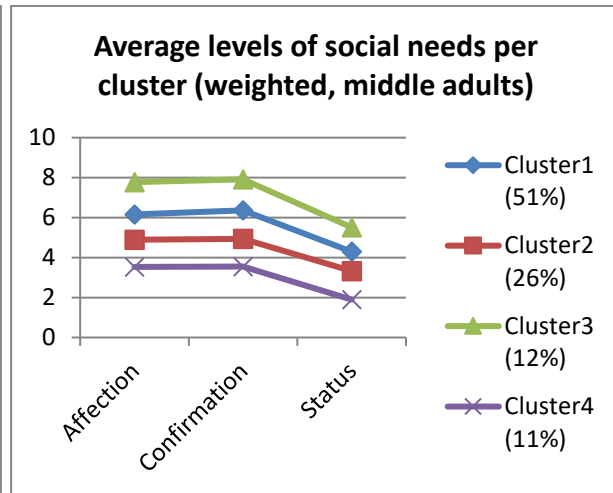

Figure 7.5. Results of weighted cluster analysis in middle adults.

Table S7.8

Goodness-of-fit measures of the 10 investigated cluster models with the **three social needs for middle adults (unweighted sample, n = 6,327)**

|                           | $N_{par}$ | $L^2$      | $df$       | $p$ -value | LL            | BIC (LL)     | Class.Err  |
|---------------------------|-----------|------------|------------|------------|---------------|--------------|------------|
| One-cluster model         | 27        | 5421       | 972        | <.001      | -34465        | 69167        | 0          |
| Two-cluster model         | 31        | 1995       | 968        | <.001      | -32752        | 65776        | .07        |
| Three-cluster model       | 35        | 1087       | 964        | .00        | -32298        | 64902        | .12        |
| <b>Four-cluster model</b> | <b>39</b> | <b>799</b> | <b>960</b> | <b>1</b>   | <b>-32155</b> | <b>64650</b> | <b>.14</b> |
| Five-cluster model        | 43        | 733        | 956        | 1          | -32121        | 64619        | .15        |
| Six-cluster model         | 47        | 697        | 952        | 1          | -32103        | 64618        | .18        |
| Seven-cluster model       | 51        | 666        | 948        | 1          | -32088        | 64621        | .19        |
| Eight-cluster model       | 55        | 655        | 944        | 1          | -32082        | 64646        | .21        |
| Nine-cluster model        | 59        | 662        | 940        | 1          | -32086        | 64688        | .35        |
| Ten-cluster model         | 63        | 613        | 936        | 1          | -32061        | 64674        | .31        |

Table S7.9

Goodness-of-fit measures of the 10 investigated cluster models with the **three social needs for middle adults (weighted sample, n = 6,267)**

|                           | $N_{par}$ | $L^2$      | $df$       | $p$ -value | LL            | BIC (LL)     | Class.Err  |
|---------------------------|-----------|------------|------------|------------|---------------|--------------|------------|
| One-cluster model         | 27        | 5371       | 972        | <.001      | -34138        | 68511        | 0          |
| Two-cluster model         | 31        | 1983       | 968        | <.001      | -32443        | 65158        | .07        |
| Three-cluster model       | 35        | 1076       | 964        | .01        | -31990        | 64286        | .12        |
| <b>Four-cluster model</b> | <b>39</b> | <b>791</b> | <b>960</b> | <b>1</b>   | <b>-31847</b> | <b>64035</b> | <b>.14</b> |
| Five-cluster model        | 43        | 755        | 956        | 1          | -31829        | 64035        | .18        |
| Six-cluster model         | 47        | 690        | 952        | 1          | -31797        | 64005        | .18        |
| Seven-cluster model       | 51        | 672        | 948        | 1          | -31788        | 64022        | .17        |
| Eight-cluster model       | 55        | 644        | 944        | 1          | -31774        | 64029        | .21        |
| Nine-cluster model        | 59        | 635        | 940        | 1          | -31769        | 64054        | .24        |
| Ten-cluster model         | 63        | 621        | 936        | 1          | -31763        | 64076        | .26        |

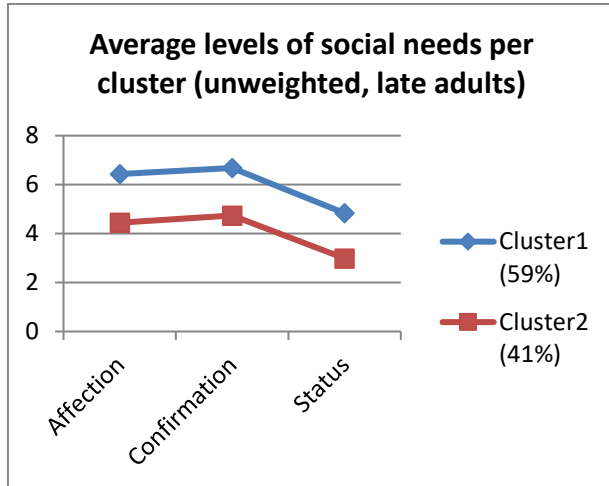

Figure 7.7. Results of cluster analysis in late adults.

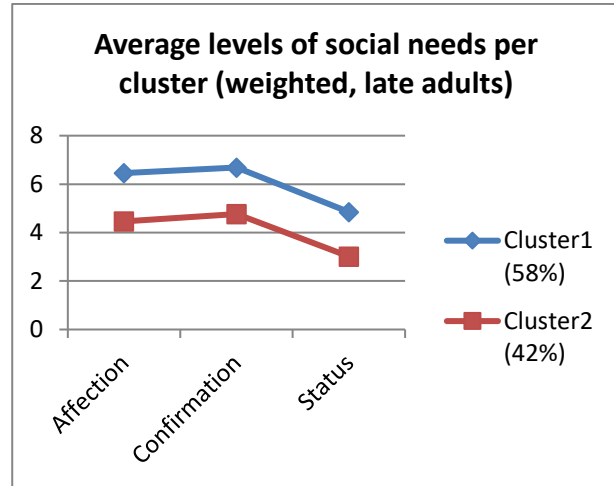

Figure 7.7. Results of weighted cluster analysis in late adults.

Table S7.10

Goodness-of-fit measures of the 10 investigated cluster models with the **three social needs for late adults (unweighted sample, n = 915)**

|                          | $N_{\text{par}}$ | $L^2$      | $df$       | $p$ -value | LL           | BIC (LL)    | Class.Err  |
|--------------------------|------------------|------------|------------|------------|--------------|-------------|------------|
| One-cluster model        | 27               | 1039       | 884        | <.001      | -4985        | 10154       | 0          |
| <b>Two-cluster model</b> | <b>31</b>        | <b>556</b> | <b>880</b> | <b>1</b>   | <b>-4743</b> | <b>9698</b> | <b>.10</b> |
| Three-cluster model      | 35               | 423        | 876        | 1          | -4677        | 9592        | .14        |
| Four-cluster model       | 39               | 377        | 872        | 1          | -4654        | 9573        | .15        |
| Five-cluster model       | 43               | 367        | 868        | 1          | -4649        | 9591        | .27        |
| Six-cluster model        | 47               | 354        | 864        | 1          | -4643        | 9605        | .23        |
| Seven-cluster model      | 51               | 345        | 860        | 1          | -4638        | 9623        | .23        |
| Eight-cluster model      | 55               | 340        | 856        | 1          | -4635        | 9645        | .23        |
| Nine-cluster model       | 59               | 334        | 852        | 1          | -4633        | 9667        | .30        |
| Ten-cluster model        | 63               | 329        | 848        | 1          | -4630        | 9689        | .27        |

Table S7.11

Goodness-of-fit measures of the 10 investigated cluster models with the **three social needs for late adults (weighted sample, n = 903)**

|                          | $N_{\text{par}}$ | $L^2$      | $df$       | $p$ -value | LL           | BIC (LL)    | Class.Err  |
|--------------------------|------------------|------------|------------|------------|--------------|-------------|------------|
| One-cluster model        | 27               | 1025       | 872        | <.001      | -4916        | 10016       | 0          |
| <b>Two-cluster model</b> | <b>31</b>        | <b>552</b> | <b>868</b> | <b>1</b>   | <b>-4680</b> | <b>9571</b> | <b>.10</b> |
| Three-cluster model      | 35               | 419        | 864        | 1          | -4613        | 9465        | .13        |
| Four-cluster model       | 39               | 374        | 860        | 1          | -4590        | 9446        | .14        |
| Five-cluster model       | 43               | 363        | 856        | 1          | -4585        | 9463        | .27        |
| Six-cluster model        | 47               | 353        | 852        | 1          | -4580        | 9480        | .25        |
| Seven-cluster model      | 51               | 344        | 848        | 1          | -4576        | 9498        | .24        |
| Eight-cluster model      | 55               | 336        | 844        | 1          | -4572        | 9517        | .24        |
| Nine-cluster model       | 59               | 337        | 840        | 1          | -4572        | 9545        | .35        |
| Ten-cluster model        | 63               | 333        | 836        | 1          | -4570        | 9569        | .33        |



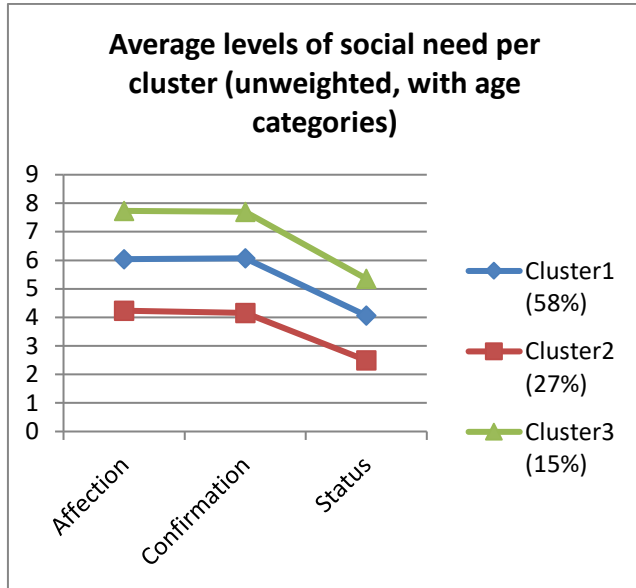

Figure 7.8. Results of cluster analysis with age categories in total sample.

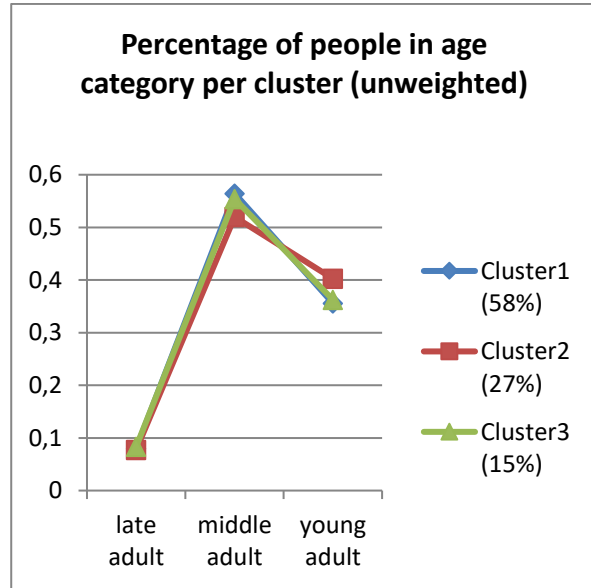

Figure 7.9. Results of cluster analysis with age categories in total sample.

Table S7.12

Goodness-of-fit measures of the 10 investigated cluster models with the **three social needs and the three age categories (unweighted sample, n = 11,471)**

|                            | $N_{par}$ | $L^2$       | $df$        | $p$ -value | LL            | BIC (LL)      | Class.Err  |
|----------------------------|-----------|-------------|-------------|------------|---------------|---------------|------------|
| One-cluster model          | 29        | 10249       | 2970        | <.001      | -73394        | 147058        | 0          |
| Two-cluster model          | 35        | 4456        | 2964        | <.001      | -70497        | 141320        | .08        |
| <b>Three-cluster model</b> | <b>41</b> | <b>2881</b> | <b>2958</b> | <b>.84</b> | <b>-69709</b> | <b>139802</b> | <b>.12</b> |
| Four-cluster model         | 47        | 2426        | 2952        | 1          | -69482        | 139403        | .15        |
| Five-cluster model         | 53        | 2232        | 2946        | 1          | -69385        | 139264        | .24        |
| Six-cluster model          | 59        | 2141        | 2940        | 1          | -69339        | 139230        | .27        |
| Seven-cluster model        | 65        | 2023        | 2934        | 1          | -69280        | 139168        | .29        |
| Eight-cluster model        | 71        | 1951        | 2928        | 1          | -69244        | 139152        | .31        |
| Nine-cluster model         | 77        | 1877        | 2922        | 1          | -69207        | 139134        | .31        |
| Ten-cluster model          | 83        | 1854        | 2916        | 1          | -69196        | 139167        | .34        |

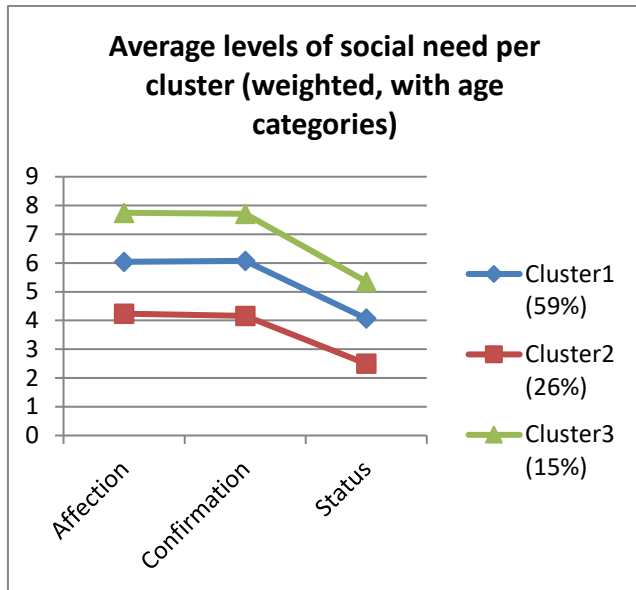

Figure 7.10. Results of weighted cluster analysis with age categories in total sample.

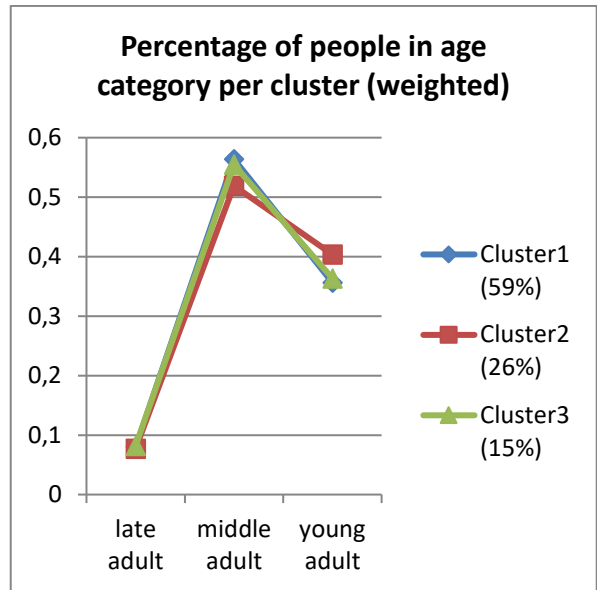

Figure 7.11. Results of weighted cluster analysis with age categories in total sample.

Table S7.13

Goodness-of-fit measures of the 10 investigated cluster models with the **three social needs and the three age categories (weighted sample, n = 11,386)**

|                            | $N_{par}$ | $L^2$       | $df$        | $p$ -value | LL            | BIC (LL)      | Class.Err  |
|----------------------------|-----------|-------------|-------------|------------|---------------|---------------|------------|
| One-cluster model          | 29        | 10147       | 2970        | <.001      | -72710        | 145691        | 0          |
| Two-cluster model          | 35        | 4413        | 2964        | <.001      | -69843        | 140013        | .08        |
| <b>Three-cluster model</b> | <b>41</b> | <b>2845</b> | <b>2958</b> | <b>.93</b> | <b>-69059</b> | <b>138501</b> | <b>.12</b> |
| Four-cluster model         | 47        | 2399        | 2952        | 1          | -68836        | 138110        | .16        |
| Five-cluster model         | 53        | 2206        | 2946        | 1          | -68740        | 137974        | .25        |
| Six-cluster model          | 59        | 2123        | 2940        | 1          | -68698        | 137947        | .28        |
| Seven-cluster model        | 65        | 2004        | 2934        | 1          | -68639        | 137884        | .28        |
| Eight-cluster model        | 71        | 1932        | 2928        | 1          | -68603        | 137868        | .31        |
| Nine-cluster model         | 77        | 1880        | 2922        | 1          | -68577        | 137872        | .32        |
| Ten-cluster model          | 83        | 1844        | 2916        | 1          | -68558        | 137891        | .34        |

**Specification of the options in Latent GOLD.**

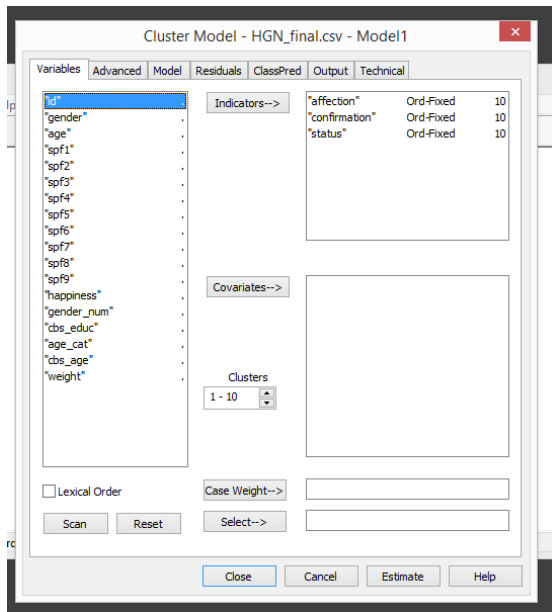

Figure 7.12. Selecting variables.

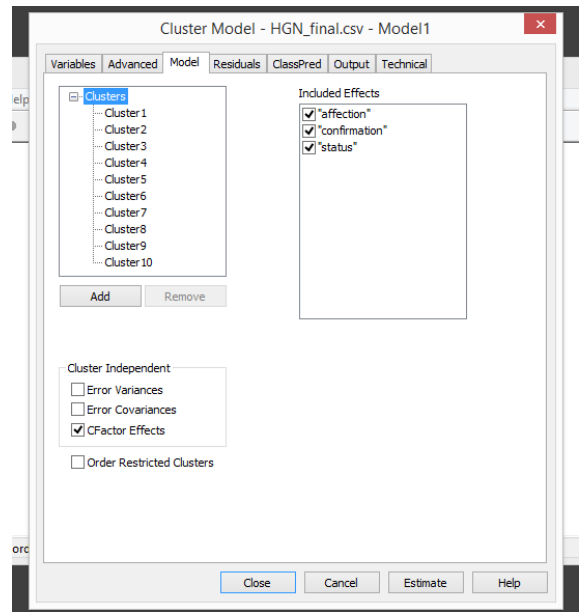

Figure 7.13. Model specification.

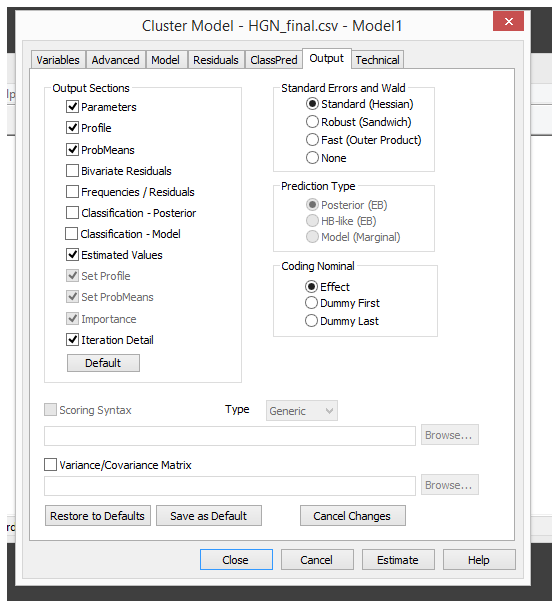

Figure 7.14. Selecting output.

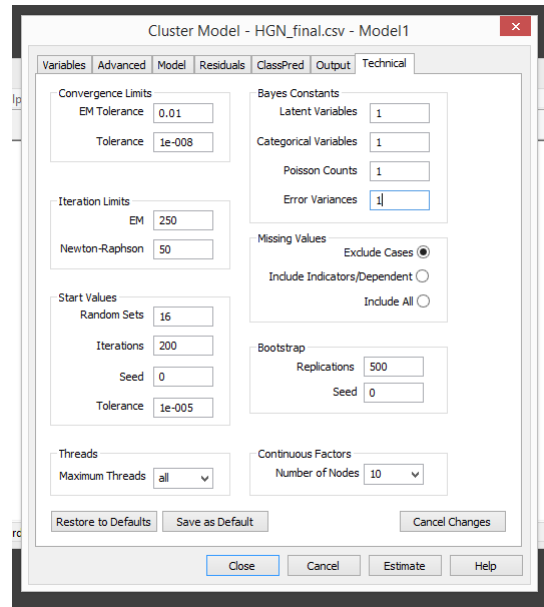

Figure 7.15. Technical specifications.

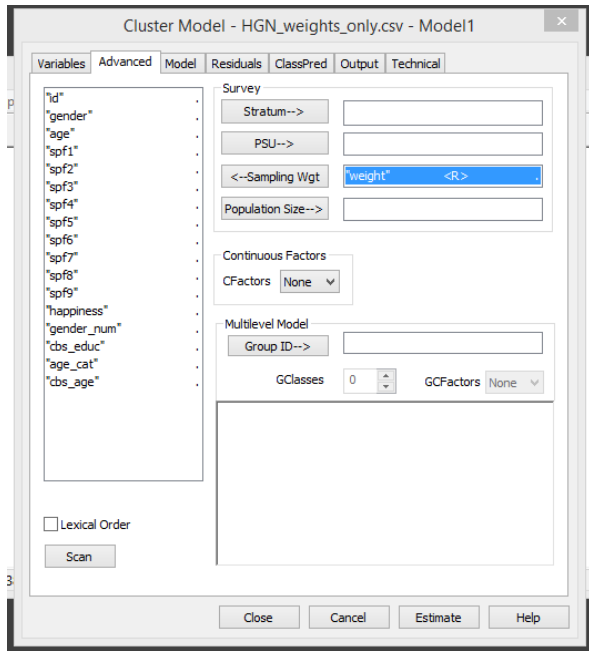

Figure 7.16. Selecting weights.

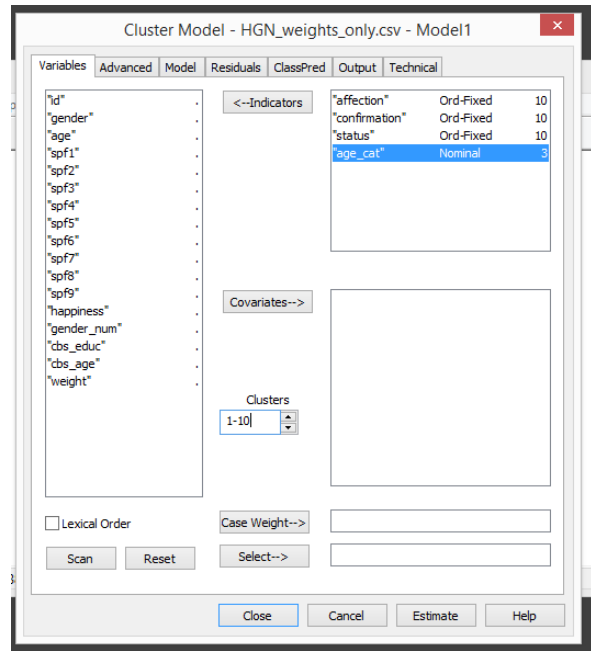

Figure 7.17. Adding age categories.
